# Supplementary material for: Stable and unstable fall motions of plate-like ice crystal analogues
Source: Copernicus journal article supplement (doi:10.5194/acp-24-11133-2024), 2024-10-09
Supplement: Supplementary file 1 [file acp-24-11133-2024-supplement.zip]

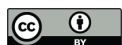

## *Supplement of*

# **Stable and unstable fall motions of plate-like ice crystal analogues**

**Jennifer R. Stout et al.**

*Correspondence to:* Jennifer R. Stout ([j.r.stout@pgr.reading.ac.uk](mailto:j.r.stout@pgr.reading.ac.uk))

- [acp-24-11133-2024-supplement-title-page.pdf](#)
- Combined case study videos for paper
  - [Spiral.mp4](#)
  - [Transitional-Z.mp4](#)
  - [Transitional.mp4](#)
  - [Zigzag.mp4](#)
  - [case\\_study\\_timeseries.xlsx](#)
  - [ice\\_analogue\\_motion\\_data.csv](#)

The copyright of individual parts of the supplement might differ from the article licence.
