# Supplementary material for: Stable and unstable fall motions of plate-like ice crystal analogues
Source: Copernicus journal article supplement (doi:10.5194/acp-24-11133-2024), 2024-10-09
Supplement: Supplementary file 1 [file acp-24-11133-2024-supplement.zip]

## Sheet: Transitional-Zigzag
	Displacement (mm)			Velocity (mm/s)			Euler angles (o)
t (s)	x	y	z	dx/dt	dy/dt	dz/dt	1	2	3	A (mm^2)	D(mm)	Inc_angles
0	-26.9535	-115.581	-21.4604				92.5	22.5	20	142.637	15.0276	22.6313
0.02	-26.8563	-114.38	-20.2191				92.5	17.5	20	145.264	15.0573	17.6721
0.04	-26.7619	-113.229	-18.9072	2.62785	50.9179	66.1231	92.5	10	22.5	147.479	15.0743	10.3047
0.06	-26.7473	-112.358	-17.5916	1.00326	39.117	65.5211	92.5	5	20	147.582	15.0745	5.58875
0.08	-26.712	-111.627	-16.3095	1.5353	34.688	61.0223	95	-2.5	20	147.546	15.0746	5.58875
0.1	-26.6982	-110.953	-15.1624	-0.648121	32.6852	55.2407	95	-7.5	20	147.759	15.0733	9.00594
0.12	-26.7377	-110.314	-14.1194	-2.92551	30.9291	45.8307	95	-15	20	146.747	15.0143	15.7932
0.14	-26.7968	-109.702	-13.3291	-1.17357	31.5889	36.8057	95	-20	20	144.679	15.0488	20.5907
0.16	-26.7988	-109.038	-12.6418	-2.7397	34.3505	29.0828	92.5	-25	20	141.582	15.0736	25.1167
0.18	-26.906	-108.323	-12.1749	-4.09149	37.1161	19.0198	92.5	-30	20	137.339	15.0608	30.0943
0.2	-26.9534	-107.527	-11.8663	-3.86093	44.7763	11.9637	92.5	-35	17.5	132.188	15.057	35.0778
0.22	-27.0516	-106.526	-11.6896	-1.96919	53.0026	6.00115	92.5	-40	17.5	125.919	15.0328	40.0649
0.24	-27.0371	-105.406	-11.6302	-0.94099	61.4193	-1.18492	90	-40	17.5	125.74	14.9729	40
0.26	-27.1024	-104.076	-11.7265	-2.92474	68.5265	-6.17987	90	-42.5	17.5	122.238	14.9493	42.5
0.28	-27.1346	-102.675	-11.8776	-0.403605	74.0574	-11.0169	90	-42.5	17.5	122.262	14.9493	42.5
0.3	-27.1301	-101.12	-12.1855	-0.800912	78.9599	-19.381	87.5	-42.5	15	122.059	14.9211	42.5595
0.32	-27.1617	-99.5287	-12.658	0.0195796	81.8537	-28.3223	87.5	-40	15	125.551	14.9446	40.0649
0.34	-27.1267	-97.858	-13.3185	1.41884	83.1194	-37.2797	87.5	-37.5	15	128.796	14.9665	37.571
0.36	-27.1119	-96.2238	-14.1441	1.04294	81.3143	-44.9787	85	-32.5	12.5	134.118	14.9724	32.8406
0.38	-27.0724	-94.6295	-15.127	3.6025	75.6125	-55.0974	85	-27.5	12.5	138.822	15.0055	27.9159
0.4	-26.9773	-93.2157	-16.331	3.97285	67.5695	-62.1665	85	-22.5	12.5	142.452	15.0321	23.0207
0.42	-26.9143	-91.94	-17.5903	4.11346	57.1025	-65.122	85	-17.5	12.5	145.001	15.0523	18.1788
0.44	-26.8007	-90.925	-18.9308	6.83283	47.7166	-67.9547	87.5	-12.5	15	146.986	15.0748	12.7436
0.46	-26.6473	-90.0081	-20.2963	8.04361	43.0443	-69.1538	87.5	-5	12.5	147.494	15.0747	5.58875
0.48	-26.4813	-89.2124	-21.6696	9.15337	35.7821	-65.7628	87.5	0	12.5	146.938	15.0503	2.5
0.5	-26.289	-88.5698	-22.9033	8.52557	29.7979	-58.5666	87.5	7.5	12.5	147.831	15.0737	7.90343
0.52	-26.1313	-88.006	-24.0041	10.1014	26.0367	-50.5723	87.5	12.5	12.5	147.506	15.0124	12.7436
0.54	-25.8937	-87.5086	-24.9168	9.81783	25.3427	-40.6642	90	20	12.5	144.844	15.0718	20
0.56	-25.7432	-86.9715	-25.6396	8.80051	27.8183	-32.9204	90	25	12.5	141.737	15.0748	25
0.58	-25.5403	-86.3764	-26.2281	8.21036	33.2567	-23.7521	90	30	12.5	137.551	15.0713	30
0.6	-25.416	-85.625	-26.5936	7.19741	41.3543	-15.1174	92.5	35	10	132.125	15.0474	35.0778
0.62	-25.2466	-84.7177	-26.8482	7.83536	50.1249	-9.70043	95	37.5	10	128.601	14.9807	37.7832
0.64	-25.1209	-83.6274	-26.9723	4.20418	57.4897	-1.61204	95	40	7.5	125.554	15.0092	40.2591
0.66	-25.0605	-82.4259	-26.9292	4.80372	63.285	2.86235	97.5	42.5	7.5	121.377	14.9198	43.0322
0.68	-24.936	-81.0878	-26.855	3.59649	71.2572	7.62801	97.5	42.5	7.5	121.387	14.9198	43.0322
0.7	-24.92	-79.5892	-26.5965	1.76215	76.8844	18.1735	100	40	5	124.098	14.8997	41.0265
0.72	-24.8605	-78.0353	-26.1416	1.44233	78.545	25.3201	100	40	5	124.101	14.8997	41.0265
0.74	-24.879	-76.458	-25.5842	-2.7859	78.9136	32.1371	100	37.5	5	127.288	14.9124	38.6202
0.76	-24.9545	-74.889	-24.833	-3.12181	77.8424	44.3031	100	32.5	5	132.9	14.936	33.8418
0.78	-25.0037	-73.3582	-23.8406	-3.36283	74.7084	50.412	100	27.5	5	137.516	14.9573	29.1279
0.8	-25.1082	-71.919	-22.8258	-7.55949	68.4667	55.2567	100	22.5	5	141.076	14.9761	24.5162
0.82	-25.3013	-70.6279	-21.6254	-10.6812	61.1751	61.7764	97.5	17.5	5	144.612	15.0466	18.9931
0.84	-25.5212	-69.4791	-20.3733	-10.9566	52.7414	65.0192	97.5	12.5	5	146.637	15.0747	14.5466
0.86	-25.7443	-68.5211	-19.0467	-12.687	43.2919	64.8308	95	5	5	147.758	15.0746	7.06657
0.88	-26.023	-67.7227	-17.8007	-13.0413	38.6329	61.4144	95	0	5	147.36	15.0736	5
0.9	-26.2707	-66.9667	-16.6043	-14.7108	34.9771	56.2947	92.5	-5	5	147.487	15.0747	5.58875
0.92	-26.602	-66.3157	-15.5731	-14.6096	32.2928	46.6658	92.5	-12.5	5	147.472	15.0351	12.7436
0.94	-26.8456	-65.6597	-14.7363	-12.8552	32.4844	37.7777	90	-17.5	5	146.123	15.0391	17.5
0.96	-27.1165	-65.0163	-14.0568	-11.6225	31.9021	29.8754	87.5	-22.5	2.5	143.441	15.0671	22.6313
0.98	-27.3015	-64.3682	-13.5411	-8.36731	33.6033	21.8797	85	-27.5	2.5	139.394	15.0722	27.9159
1	-27.4593	-63.6403	-13.1813	-6.9641	40.9202	13.6241	85	-32.5	2.5	134.731	15.0696	32.8406
1.02	-27.5801	-62.7164	-12.9828	-5.5427	50.747	7.8852	82.5	-35	0	131.473	15.0567	35.6941
1.04	-27.6738	-61.6229	-12.8609	-2.62676	57.7986	2.965	80	-37.5	-2.5	127.828	15.039	38.6202
1.06	-27.6876	-60.4082	-12.8704	-0.254089	64.3946	-3.22037	77.5	-40	-2.5	123.616	14.9774	41.5924
1.08	-27.6889	-59.0467	-12.9936	1.22901	71.2725	-9.96315	75	-40	-5	122.569	14.9487	42.2735
1.1	-27.6398	-57.5612	-13.2719	2.31584	77.7817	-17.2586	75	-40	-5	122.556	14.9487	42.2735
1.12	-27.5864	-55.952	-13.6812	5.33313	81.7559	-23.8186	75	-37.5	-5	125.676	14.9483	39.9754
1.14	-27.423	-54.3186	-14.2288	8.9899	80.6081	-31.0916	75	-35	-5	128.556	14.9473	37.6984
1.16	-27.2344	-52.7272	-14.9328	10.7278	80.5766	-39.9154	75	-32.5	-5	131.196	14.9459	35.4469
1.18	-26.9816	-51.1081	-15.8227	15.2567	78.8065	-48.2294	77.5	-27.5	-5	137.084	15.0146	30.0046
1.2	-26.6298	-49.6066	-16.8522	18.5493	71.2063	-54.9883	80	-22.5	-2.5	141.614	15.0422	24.5162
1.22	-26.2475	-48.2678	-18.0093	20.3412	63.314	-59.5982	80	-17.5	-2.5	144.088	15.0416	20.0777
1.24	-25.814	-47.0941	-19.2285	22.7494	51.2473	-63.4921	82.5	-12.5	-2.5	146.407	15.0704	14.5466
1.26	-25.3376	-46.2034	-20.5297	25.379	41.696	-64.3894	85	-7.5	-2.5	147.429	15.0726	9.00594
1.28	-24.8105	-45.3912	-21.7776	25.789	38.9999	-60.6912	85	0	-2.5	147.329	15.0736	5
1.3	-24.3102	-44.6512	-22.9484	26.0164	34.0938	-56.5437	87.5	5	-2.5	147.359	15.0748	5.58875
1.32	-23.7841	-44.036	-24.0124	23.5096	26.9827	-47.4516	90	12.5	-2.5	147.55	15.0209	12.5
1.34	-23.3706	-43.5445	-24.8371	21.2042	24.858	-36.7275	92.5	17.5	-2.5	146.045	15.0434	17.6721
1.36	-22.9354	-43.0138	-25.499	19.207	27.2183	-29.8417	95	22.5	-5	143.218	15.0638	23.0207
1.38	-22.6098	-42.4394	-26.0266	15.4716	31.6583	-21.5856	97.5	27.5	-5	139.031	15.0748	28.4272
1.4	-22.3074	-41.7278	-26.366	14.0079	39.6994	-13.703	100	30	-7.5	136.137	15.071	31.4749
1.42	-22.0592	-40.8549	-26.5927	10.354	46.4678	-9.65154	105	35	-10	128.92	15.0275	37.6984
1.44	-21.8931	-39.8652	-26.7393	6.81806	53.9085	-2.61214	107.5	37.5	-12.5	124.796	15.0112	40.8316
1.46	-21.7806	-38.6908	-26.697	4.46269	63.0891	4.45109	107.5	37.5	-12.5	124.791	15.0112	40.8316
1.48	-21.7144	-37.3533	-26.5734	2.05986	70.2291	9.12966	110	37.5	-12.5	123.181	14.9371	41.7972
1.5	-21.7005	-35.9012	-26.3333	-0.737778	73.9568	13.4899	110	37.5	-12.5	123.18	14.9371	41.7972
1.52	-21.7468	-34.4029	-26.0209	-3.8598	76.6057	20.087	110	35	-12.5	125.999	14.9272	39.6685
1.54	-21.863	-32.8372	-25.5148	-8.55842	79.877	29.5435	110	32.5	-15	128.787	14.9662	37.5775
1.56	-22.0879	-31.2273	-24.8458	-12.9384	79.9434	37.5306	110	30	-15	131.131	14.9532	35.5313
1.58	-22.3754	-29.6666	-24.023	-16.1491	75.2711	44.0098	107.5	25	-12.5	136.636	14.9671	30.1902
1.6	-22.7406	-28.224	-23.0944	-20.9327	69.8654	48.9141	105	20	-12.5	141.167	15.0137	24.8142
1.62	-23.2089	-26.8761	-22.0657	-25.0946	64.3053	54.5326	102.5	15	-10	144.338	15.0391	19.4333
1.64	-23.7328	-25.6712	-20.9264	-26.9312	54.8503	58.1525	100	10	-10	146.72	15.0747	14.106
1.66	-24.2898	-24.6771	-19.7674	-30.032	46.593	56.7461	97.5	5	-10	147.764	15.0732	9.00594
1.68	-24.9239	-23.7958	-18.6644	-31.5356	40.2447	54.7848	95	0	-10	147.428	15.0734	5
1.7	-25.5303	-23.0557	-17.5888	-29.113	35.3261	50.9217	92.5	-5	-10	147.458	15.0748	5.58875
1.72	-26.088	-22.3587	-16.646	-27.3692	35.0434	43.7856	90	-10	-12.5	147.736	15.0683	10
1.74	-26.6151	-21.6584	-15.8413	-23.629	33.255	36.5117	85	-15	-12.5	146.711	15.0413	15.7932
1.76	-27.034	-21.028	-15.1934	-20.3053	30.9887	27.8004	82.5	-20	-15	144.283	15.0523	21.306
1.78	-27.4279	-20.3912	-14.7308	-17.3509	33.8736	18.5149	80	-25	-15	140.488	15.0684	26.806
1.8	-27.717	-19.6585	-14.4338	-11.9431	38.3872	12.9446	75	-27.5	-17.5	136.537	15.0694	31.0423
1.82	-27.9144	-18.8318	-14.2077	-8.6467	47.3028	8.20435	72.5	-30	-20	133.096	15.0647	34.3158
1.84	-28.06	-17.7662	-14.1155	-4.58722	55.9569	1.1314	67.5	-32.5	-22.5	127.484	15.0199	38.8133
1.86	-28.097	-16.6059	-14.1537	-0.0688896	61.8384	-4.29617	65	-35	-22.5	122.944	14.9718	42.0634
1.88	-28.0764	-15.2808	-14.2732	1.26589	70.7903	-6.64953	65	-35	-22.5	122.94	14.9718	42.0634
1.9	-28.0288	-13.7901	-14.4378	6.44731	76.7832	-12.6491	62.5	-35	-25	120.953	14.9466	43.3982
1.92	-27.8186	-12.229	-14.7923	11.3971	79.278	-21.2521	62.5	-32.5	-25	123.438	14.923	41.5742
1.94	-27.5823	-10.6191	-15.2709	13.9127	82.7207	-25.798	65	-30	-25	127.978	14.9792	38.2899
1.96	-27.2396	-8.94006	-15.8374	21.3052	82.9638	-33.2945	67.5	-27.5	-22.5	131.924	14.9869	34.9661
1.98	-26.7356	-7.33151	-16.607	27.368	77.5264	-41.7569	70	-22.5	-22.5	137.295	15.0121	29.7542
2	-26.1579	-5.83925	-17.4908	30.8619	73.1197	-47.0725	72.5	-20	-20	140.186	15.0253	26.3369
2.02	-25.4975	-4.41903	-18.4763	35.4234	66.738	-50.0541	75	-15	-20	143.63	15.0438	21.0906
2.04	-24.7416	-3.18898	-19.4943	40.196	57.1086	-54.1078	77.5	-10	-20	145.963	15.0666	15.9579
2.06	-23.9065	-2.14644	-20.6221	41.9452	44.9304	-54.9829	82.5	-5	-20	147.57	15.0746	9.00594
2.08	-23.0774	-1.36461	-21.6714	41.5187	37.5994	-52.2141	85	0	-20	147.517	15.0725	5
2.1	-22.2505	-0.607362	-22.6972	40.689	37.292	-47.7448	87.5	5	-20	147.581	15.0745	5.58875
2.12	-21.4579	0.0997884	-23.5637	38.6932	30.548	-40.1313	92.5	10	-20	147.791	15.0586	10.3047
2.14	-20.716	0.618625	-24.3023	34.4495	24.0303	-32.9718	95	15	-20	146.749	15.0143	15.7932
2.16	-20.0881	1.11177	-24.8807	28.9914	27.2602	-25.385	100	17.5	-22.5	144.91	15.0584	20.0777
2.18	-19.56	1.72125	-25.3193	22.6585	31.3708	-17.9451	105	22.5	-25	140.414	15.0739	26.8237
2.2	-19.1678	2.37833	-25.6073	19.3256	37.1345	-12.1905	107.5	25	-25	137.397	15.073	30.1902
2.22	-18.7916	3.22208	-25.8088	15.0796	45.9794	-6.65444	112.5	27.5	-27.5	132.238	15.0475	34.9661
2.24	-18.5792	4.20611	-25.8705	7.44821	51.8621	-0.138058	115	30	-27.5	128.139	15.018	38.2899
2.26	-18.47	5.30845	-25.828	5.01792	60.5086	3.75948	117.5	30	-30	126.103	14.998	39.8098
2.28	-18.3824	6.62238	-25.7283	1.43033	68.5357	6.06717	120	30	-32.5	123.868	14.9774	41.4096
2.3	-18.4218	8.03018	-25.5729	-3.91903	72.926	10.8476	120	30	-32.5	123.868	14.9774	41.4096
2.32	-18.5366	9.53147	-25.2855	-8.33838	76.3108	17.0797	120	27.5	-32.5	125.896	14.9481	39.8098
2.34	-18.7629	11.0789	-24.8892	-14.2511	79.5331	23.222	120	27.5	-32.5	125.892	14.9481	39.8098
2.36	-19.1104	12.6973	-24.3577	-20.6982	80.2486	29.157	117.5	22.5	-30	131.572	14.91	34.9661
2.38	-19.5922	14.2691	-23.7238	-27.4361	77.6996	34.9328	115	20	-30	135.259	14.9562	31.6083
2.4	-20.2032	15.7935	-22.9602	-33.4287	73.8676	41.2944	112.5	17.5	-30	138.488	14.9933	28.2223
2.42	-20.9208	17.2006	-22.0935	-37.8152	65.7902	43.4716	110	12.5	-30	141.884	14.9958	23.4485
2.44	-21.7159	18.421	-21.226	-42.7556	57.3593	45.3985	105	7.5	-27.5	145.892	15.0721	16.7319
2.46	-22.6182	19.499	-20.2833	-45.5803	49.8413	46.7293	102.5	5	-27.5	147.084	15.0713	13.4481
2.48	-23.5217	20.4149	-19.374	-45.2318	41.9926	45.1914	97.5	0	-27.5	147.823	15.0739	7.5
2.5	-24.4271	21.1903	-18.492	-45.7817	36.0571	41.1488	92.5	-5	-27.5	147.624	15.074	5.58875
2.52	-25.3314	21.8727	-17.7415	-42.6076	32.2437	34.9313	87.5	-10	-30	147.664	15.0697	10.3047
2.54	-26.1089	22.5073	-17.0992	-35.3615	33.3876	28.2572	82.5	-12.5	-30	147.111	15.0128	14.5466
2.56	-26.7502	23.2125	-16.6157	-29.5353	35.0135	20.6558	80	-15	-30	145.938	15.0359	17.9639
2.58	-27.2905	23.8959	-16.2674	-23.6364	33.4679	13.9607	75	-20	-32.5	142.044	15.0562	24.8142
2.6	-27.6956	24.5784	-16.0441	-17.6417	37.0731	9.74667	70	-22.5	-35	137.916	15.0736	29.7542
2.62	-27.9997	25.4022	-15.8771	-12.349	44.4827	5.37882	65	-25	-37.5	132.666	15.0718	34.7754
2.64	-28.1895	26.3653	-15.8329	-6.7979	52.8199	-0.0858935	60	-25	-40	128.243	15.039	38.2899
2.66	-28.2775	27.5151	-15.8686	-2.46485	61.1745	-3.18121	57.5	-25	-40	125.622	14.9907	40.1488
2.68	-28.2872	28.8047	-15.9552	2.08156	68.3108	-5.26173	57.5	-25	-40	125.621	14.9907	40.1488
2.7	-28.1895	30.2356	-16.0921	7.46347	73.2515	-9.94479	55	-25	-42.5	122.958	14.9762	42.0634
2.72	-27.9849	31.7347	-16.3579	13.2714	78.8766	-15.3961	55	-22.5	-42.5	124.522	14.9373	40.8173
2.74	-27.6505	33.3751	-16.7034	20.8409	82.0864	-19.6919	57.5	-22.5	-42.5	127.398	14.9997	38.8133
2.76	-27.1601	34.9907	-17.1506	26.1184	80.178	-25.1011	60	-20	-40	131.262	14.9822	35.5313
2.78	-26.5933	36.5825	-17.7074	34.1096	79.3916	-30.6008	62.5	-17.5	-40	134.905	15.0034	32.2254
2.8	-25.7957	38.1507	-18.3656	42.1531	76.0545	-34.7095	65	-12.5	-40	138.803	14.9856	27.77
2.82	-24.9212	39.6015	-19.0793	47.5027	68.8657	-35.6368	70	-10	-37.5	142.843	15.0276	22.2687
2.84	-23.9002	40.8897	-19.7959	52.9039	59.6195	-38.0531	75	-7.5	-37.5	145.746	15.0668	16.7319
2.86	-22.8305	41.9667	-20.5971	53.2206	46.073	-40.042	77.5	-2.5	-37.5	147.245	15.0693	12.7436
2.88	-21.7667	42.7641	-21.3749	55.3344	38.3297	-38.154	82.5	0	-37.5	147.804	15.0747	7.5
2.9	-20.6254	43.5387	-22.1011	56.6442	38.1374	-32.4967	87.5	5	-37.5	147.634	15.0738	5.58875
2.92	-19.5402	44.266	-22.6709	50.3805	32.1673	-26.3111	92.5	7.5	-37.5	147.679	15.0742	7.90343
2.94	-18.6136	44.8295	-23.1658	44.5461	26.644	-22.8994	97.5	10	-37.5	147.548	15.0158	12.4771
2.96	-17.7628	45.3706	-23.5783	38.1116	28.5843	-17.8062	102.5	15	-40	145.302	15.013	19.4333
2.98	-17.0976	45.9807	-23.8645	29.9376	30.6407	-9.81035	107.5	17.5	-40	142.219	15.0597	24.5532
3	-16.5593	46.6158	-23.987	23.091	36.1166	-5.05176	112.5	17.5	-42.5	139.193	15.0745	28.2223
3.02	-16.1698	47.4369	-24.0807	16.9371	43.4126	-2.82065	117.5	20	-42.5	133.867	15.0545	33.5382
3.04	-15.8823	48.3522	-24.095	10.5691	50.1058	0.697381	122.5	20	-45	128.956	15.0049	37.5775
3.06	-15.7472	49.4531	-24.052	3.84938	59.6749	4.38263	125	20	-47.5	126.257	14.9939	39.6685
3.08	-15.7151	50.7198	-23.9249	-0.129596	65.0807	7.11958	127.5	20	-47.5	123.173	14.9348	41.7972
3.1	-15.7559	52.0559	-23.772	-4.90614	70.9695	8.70548	127.5	20	-47.5	123.171	14.9348	41.7972
3.12	-15.921	53.5548	-23.5633	-11.1984	76.5997	13.2224	127.5	17.5	-47.5	124.299	14.8832	40.8316
3.14	-16.2166	55.1001	-23.2479	-19.8017	78.6695	16.4523	125	15	-47.5	128.373	14.9012	37.6984
3.16	-16.7129	56.6898	-22.9056	-28.2622	79.3731	19.4015	125	15	-47.5	128.371	14.9012	37.6984
3.18	-17.3388	58.2557	-22.459	-35.0641	76.6125	25.3706	120	12.5	-47.5	134.706	14.9757	32.2748
3.2	-18.1157	59.7502	-21.9084	-42.1228	73.8991	27.833	117.5	10	-47.5	137.66	14.9825	29.1279
3.22	-19.0234	61.1958	-21.3593	-49.4376	68.6987	27.8663	112.5	7.5	-45	141.87	15.0091	23.6553
3.24	-20.0803	62.4749	-20.7886	-54.7154	59.1549	29.5055	107.5	2.5	-45	145.534	15.071	17.6721
3.26	-21.1912	63.5661	-20.1887	-56.3499	50.9251	29.4378	102.5	0	-45	147.376	15.0619	12.5
3.28	-22.3263	64.5155	-19.6244	-56.9988	43.0996	27.1482	97.5	-2.5	-45	147.838	15.0729	7.90343
3.3	-23.4672	65.2983	-19.1107	-57.846	36.2324	23.8329	92.5	-5	-47.5	147.575	15.0746	5.58875
3.32	-24.6088	65.9886	-18.6803	-53.2581	33.7301	18.722	85	-7.5	-47.5	147.763	15.0733	9.00594
3.34	-25.5679	66.6554	-18.3561	-43.3157	31.7206	15.0721	80	-10	-47.5	147.219	15.0166	14.106
3.36	-26.3495	67.2769	-18.0809	-35.5964	32.9187	10.62	75	-12.5	-50	145.301	15.0168	19.4333
3.38	-26.9973	67.9917	-17.9327	-28.9891	37.9128	5.66812	70	-12.5	-52.5	142.965	15.0598	23.4485
3.4	-27.5008	68.7782	-17.8417	-20.4243	38.9888	3.32577	65	-15	-52.5	138.691	15.0728	28.9046
3.42	-27.8208	69.5665	-17.8025	-12.933	42.8169	-0.0189642	60	-15	-55	134.358	15.072	33.2259
3.44	-28.0357	70.5178	-17.8379	-9.1075	51.6422	-2.60823	55	-15	-55	128.94	15.0314	37.6984
3.46	-28.1728	71.6326	-17.8983	-2.41613	59.9806	-3.60636	52.5	-15	-57.5	126.024	15.0302	39.9754
3.48	-28.1317	72.913	-17.9817				50	-15	-57.5	122.727	14.9936	42.2735
3.5	-28.0083	74.3328	-18.0867				50	-12.5	-57.5	123.499	14.9467	41.5924

## Sheet: Spiral
	Displacement (mm)			Velocity (mm/s)			Euler angles (o)
t (s)	x	y	z	dx/dt	dy/dt	dz/dt	1	2	3	A (mm^2)	D(mm)	Inc_angles
0	5.11031	-116.181	-25.098				70	350	17.5	106.435	15.0101	22.2687
0.02	5.16729	-115.499	-25.5028				70	352.5	17.5	106.957	15.008	21.306
0.04	5.24742	-114.765	-25.9467	6.55706	35.836	-20.9898	70	357.5	17.5	107.419	15.0068	20.1493
0.06	5.43504	-114.071	-26.3276	11.2241	34.9602	-17.4233	67.5	360	17.5	106.124	14.9662	22.5
0.08	5.67864	-113.359	-26.6583	12.1225	35.6933	-17.1948	67.5	362.5	20	105.78	14.8812	22.6313
0.1	5.92327	-112.644	-27.0145	14.0051	35.9786	-16.8868	70	365	20	106.811	14.9043	20.5907
0.12	6.24389	-111.918	-27.315	17.0632	36.8546	-12.5781	70	367.5	20	106.664	14.953	21.306
0.14	6.59579	-111.176	-27.528	17.8631	36.6479	-10.6971	70	370	20	106.324	14.9869	22.2687
0.16	6.9636	-110.456	-27.7479	20.0234	35.5285	-9.82275	72.5	372.5	20	106.897	15.012	21.3915
0.18	7.39382	-109.748	-27.9106	21.8506	36.011	-7.098	75	372.5	20	107.801	15.0046	19.4333
0.2	7.8225	-109.019	-28.0186	20.499	35.3963	-1.65905	75	375	20	107.052	15.0109	21.0906
0.22	8.22285	-108.323	-27.9898	21.3171	36.702	1.02073	80	377.5	17.5	107.256	14.9818	20.0777
0.24	8.67607	-107.556	-27.9832	22.5324	37.3281	2.80157	82.5	377.5	17.5	107.606	14.9459	18.9931
0.26	9.10625	-106.845	-27.8727	20.0852	34.7304	5.82775	85	380	17.5	106.729	14.9012	20.5907
0.28	9.48196	-106.154	-27.7539	18.4162	34.9291	7.76052	87.5	380	17.5	107.227	14.9652	20.1493
0.3	9.84955	-105.445	-27.5542	17.8849	35.4587	11.5405	90	380	15	107.419	14.9925	20
0.32	10.2026	-104.739	-27.2975	18.717	34.9238	14.2713	92.5	380	15	107.451	15.0114	20.1493
0.34	10.5788	-104.038	-26.9911	15.6231	36.5179	15.6852	95	380	15	107.319	15.0036	20.5907
0.36	10.8236	-103.282	-26.6747	12.138	37.2157	15.9367	97.5	377.5	15	107.946	15.0111	18.9931
0.38	11.0682	-102.551	-26.3359	9.41172	38.2038	20.1585	100	377.5	12.5	107.414	15.0006	20.0777
0.4	11.2052	-101.77	-25.8807	7.52242	36.0544	21.8524	102.5	375	12.5	107.452	14.9474	19.4333
0.42	11.3729	-101.108	-25.4778	6.937	33.8995	20.3059	105	372.5	12.5	107.347	14.9204	19.4333
0.44	11.4554	-100.396	-25.0545	0.525568	35.1727	22.2829	107.5	370	12.5	107.348	14.9859	20.0777
0.46	11.4045	-99.701	-24.5991	-3.49412	36.2607	21.5192	107.5	367.5	12.5	107.921	15.0094	18.9931
0.48	11.3323	-98.9512	-24.1991	-4.20605	36.4886	19.7524	110	365	12.5	107.272	15.0046	20.5907
0.5	11.227	-98.2496	-23.7997	-7.24167	35.0899	20.0868	110	362.5	12.5	107.463	15.0119	20.1493
0.52	11.0443	-97.5429	-23.3998	-9.55386	34.8068	19.7179	110	360	12.5	107.459	15.002	20
0.54	10.8382	-96.856	-23.0252	-13.3839	34.5026	16.4942	110	357.5	12.5	107.245	14.9681	20.1493
0.56	10.5155	-96.1555	-22.735	-15.9232	35.7242	14.6451	110	352.5	12.5	106.413	14.8808	21.306
0.58	10.2087	-95.4314	-22.4399	-17.0088	35.9762	12.8243	110	350	15	106.194	14.9519	22.2687
0.6	9.82987	-94.7199	-22.2323	-19.5112	35.587	8.60264	107.5	347.5	15	106.832	15.0055	21.3915
0.62	9.43553	-94.0054	-22.0812	-20.3952	35.647	7.77105	105	345	12.5	107.055	15.0102	21.0906
0.64	9.01242	-93.2889	-21.9305	-22.0062	36.7778	4.97246	105	345	15	107.064	15.0048	21.0906
0.66	8.56396	-92.5386	-21.8906	-21.9465	37.1541	0.319154	102.5	342.5	12.5	106.891	15.012	21.3915
0.68	8.13882	-91.8121	-21.9005	-21.1857	35.5242	-0.366475	100	340	12.5	106.311	14.9827	22.2687
0.7	7.71395	-91.1083	-21.9184	-21.1058	35.8937	-3.87353	97.5	340	12.5	106.627	14.9434	21.306
0.72	7.29687	-90.3721	-22.0648	-20.5124	37.2344	-9.45584	95	337.5	12.5	105.414	14.8274	23.0207
0.74	6.89376	-89.6328	-22.2752	-20.0512	35.5905	-10.4426	90	337.5	10	106.05	14.9457	22.5
0.76	6.50025	-88.9443	-22.4855	-18.6022	34.9041	-12.4691	87.5	337.5	10	106.171	14.991	22.6313
0.78	6.15325	-88.2281	-22.7779	-16.6049	35.9367	-15.2976	85	340	10	107.283	15.0119	20.5907
0.8	5.83734	-87.5114	-23.0943	-14.7288	35.8771	-17.4143	82.5	340	7.5	106.964	15.0061	21.306
0.82	5.57567	-86.7941	-23.4735	-10.1516	35.8111	-19.6433	80	342.5	7.5	107.484	15.0113	20.0777
0.84	5.41453	-86.0827	-23.8707	-9.34163	34.9204	-20.0101	77.5	342.5	7.5	106.779	14.993	21.3915
0.86	5.20712	-85.3932	-24.2752	-7.38467	34.8336	-20.7654	75	345	7.5	106.677	14.9274	21.0906
0.88	5.13095	-84.6855	-24.7052	-2.96304	35.5259	-22.5055	72.5	347.5	7.5	106.396	14.8884	21.3915
0.9	5.07933	-83.9766	-25.1661	-0.947119	35.2712	-22.5186	72.5	350	7.5	107.214	14.9547	20.0777
0.92	5.10331	-83.2758	-25.5968	3.698	34.8577	-20.8098	70	352.5	7.5	106.839	15.0002	21.306
0.94	5.21335	-82.5809	-26.0035	5.31216	34.6517	-20.3537	70	355	7.5	107.277	15.012	20.5907
0.96	5.31556	-81.8858	-26.41	6.96958	35.225	-19.7687	70	357.5	7.5	107.497	15.0036	20.1493
0.98	5.50238	-81.173	-26.7861	10.9405	35.5767	-17.5799	70	360	7.5	107.509	15.0116	20
1	5.74288	-80.4666	-27.1131	12.3723	35.0794	-15.4834	70	362.5	7.5	107.354	14.9949	20.1493
1.02	6.00623	-79.7655	-27.4096	16.0388	35.5153	-14.2257	70	365	7.5	106.991	14.9533	20.5907
1.04	6.37699	-79.0454	-27.6821	18.25	36.1908	-13.0783	70	367.5	7.5	106.432	14.8868	21.306
1.06	6.72596	-78.3265	-27.9235	18.5083	34.8325	-10.1923	72.5	370	7.5	107.147	14.9366	20.0777
1.08	7.12073	-77.6404	-28.0855	19.8571	36.0983	-6.57516	75	372.5	7.5	107.693	14.9998	19.4333
1.1	7.5141	-76.8856	-28.1906	19.6961	36.7684	-3.76348	75	375	7.5	107.01	15.0101	21.0906
1.12	7.91642	-76.1817	-28.2411	21.6145	34.6066	-2.13959	77.5	377.5	7.5	106.916	15.0051	21.3915
1.14	8.36447	-75.4812	-28.2655	20.4555	37.0919	1.79858	80	377.5	7.5	107.487	15.0118	20.0777
1.16	8.73619	-74.7102	-28.171	19.8718	36.7413	5.09683	82.5	377.5	7.5	107.858	14.9999	18.9931
1.18	9.16291	-74.0162	-28.0614	20.289	35.6204	8.58011	87.5	380	5	106.98	14.8987	20.1493
1.2	9.53472	-73.28	-27.8313	17.8137	35.8962	11.613	90	380	5	107.138	14.926	20
1.22	9.88337	-72.5881	-27.6074	17.3406	34.3096	12.4821	92.5	380	5	107.296	14.978	20.1493
1.24	10.2245	-71.9002	-27.3262	16.1321	34.3717	14.9016	95	377.5	5	108.254	15.0113	18.1788
1.26	10.5197	-71.2121	-27.0162	13.1054	33.8813	16.0832	97.5	377.5	2.5	107.978	15.0101	18.9931
1.28	10.7539	-70.5213	-26.6783	11.527	38.6704	18.415	100	375	2.5	108.341	15.012	17.9639
1.3	10.9731	-69.6885	-26.2842	8.43387	39.032	19.7241	102.5	375	2.5	107.689	15.0014	19.4333
1.32	11.0849	-68.9921	-25.8895	4.16324	32.5617	21.2097	105	372.5	2.5	107.433	14.9438	19.4333
1.34	11.1432	-68.3462	-25.4397	0.507282	35.0341	22.2874	107.5	370	2.5	107.057	14.913	20.0777
1.36	11.1156	-67.5981	-25.0126	-1.15498	35.0457	20.3182	107.5	367.5	2.5	107.722	14.9715	18.9931
1.38	11.097	-66.9449	-24.6177	-2.71313	35.0239	20.5536	110	365	2.5	107.214	15.0055	20.5907
1.4	10.9927	-66.1927	-24.1903	-7.39767	36.108	21.065	110	362.5	2.5	107.49	15.011	20.1493
1.42	10.8115	-65.5081	-23.7939	-9.61366	35.4805	17.5973	110	360	2.5	107.56	15.0081	20
1.44	10.607	-64.7697	-23.4771	-12.3278	35.9761	16.4547	110	357.5	2.5	107.44	15.0095	20.1493
1.46	10.3184	-64.0769	-23.1355	-15.0174	34.4117	15.3242	110	355	2.5	107.121	14.9856	20.5907
1.48	10.0063	-63.377	-22.8725	-17.9172	36.5011	12.4536	110	350	2.5	105.897	14.8624	22.2687
1.5	9.61036	-62.6254	-22.6349	-19.21	36.4655	10.506	110	347.5	2.5	105.294	14.8591	23.4485
1.52	9.24296	-61.9183	-22.4609	-19.5992	36.6651	6.70649	107.5	347.5	2.5	106.535	14.9284	21.3915
1.54	8.82191	-61.1587	-22.3644	-21.0032	36.9993	3.25861	105	345	2.5	106.938	14.9957	21.0906
1.56	8.4026	-60.4432	-22.3184	-22.4628	36.164	2.31027	105	342.5	2.5	106.094	15.0072	22.8949
1.58	7.92821	-59.7041	-22.2772	-23.1762	37.2451	0.431826	102.5	340	2.5	105.852	15.0035	23.4485
1.6	7.48445	-58.9604	-22.318	-22.0804	36.6355	-4.87983	100	340	2.5	106.461	15.0119	22.2687
1.62	7.03902	-58.2353	-22.4645	-22.5677	36.7997	-8.4262	95	340	0	107.131	14.9873	20.5907
1.64	6.58833	-57.4853	-22.6457	-21.8024	37.8069	-10.3385	92.5	340	0	107.146	14.9435	20.1493
1.66	6.17552	-56.7351	-22.8767	-19.4211	36.3107	-12.0614	90	340	0	107.011	14.878	20
1.68	5.80906	-56.0325	-23.134	-17.7712	35.0092	-15.0856	87.5	340	-2.5	107.061	14.9223	20.1493
1.7	5.46589	-55.3275	-23.4761	-15.944	35.3567	-17.2771	85	340	-2.5	107.068	14.973	20.5907
1.72	5.17632	-54.6267	-23.82	-13.0446	33.6909	-18.4574	82.5	342.5	-2.5	107.911	15.0109	18.9931
1.74	4.94025	-53.9748	-24.2184	-11.011	32.9737	-20.8773	80	342.5	-2.5	107.498	15.0073	20.0777
1.76	4.7347	-53.2964	-24.6428	-9.43654	34.5418	-20.7605	77.5	345	-2.5	107.762	15.0114	19.4333
1.78	4.57549	-52.5985	-25.0478	-5.23153	34.8222	-20.6734	75	347.5	-2.5	107.578	14.9771	19.4333
1.8	4.52301	-51.9066	-25.473	-1.57661	34.6985	-21.2177	72.5	350	-2.5	106.981	14.8905	20.0777
1.82	4.5023	-51.2135	-25.8983	-0.0961997	33.9968	-22.3907	72.5	352.5	-2.5	107.613	14.9374	18.9931
1.84	4.52754	-50.5446	-26.3545	3.40403	33.8032	-20.7937	72.5	355	-2.5	108.103	14.9866	18.1788
1.86	4.63484	-49.8615	-26.7259	5.99582	33.4108	-18.6178	70	357.5	-2.5	107.436	15.0095	20.1493
1.88	4.7664	-49.2032	-27.1033	8.33362	34.0164	-17.3561	70	360	-2.5	107.549	15.0081	20
1.9	4.97417	-48.5013	-27.4202	12.1387	34.5078	-15.9866	70	362.5	-2.5	107.481	15.011	20.1493
1.92	5.24208	-47.8267	-27.7436	13.8271	34.0691	-15.1685	70	365	-2.5	107.212	15.0055	20.5907
1.94	5.52704	-47.1311	-28.0118	15.8147	35.299	-11.1606	72.5	367.5	-2.5	107.735	14.9715	18.9931
1.96	5.87084	-46.4181	-28.1951	17.0409	35.6615	-8.54222	72.5	370	-2.5	107.052	14.913	20.0777
1.98	6.20866	-45.7049	-28.3535	18.5823	36.2406	-5.79995	75	372.5	-2.5	107.44	14.9438	19.4333
2	6.60527	-44.9758	-28.4271	18.251	35.0656	-2.925	75	375	-2.5	106.841	14.9677	21.0906
2.02	6.94277	-44.2904	-28.4759	18.7094	36.573	-1.28033	77.5	377.5	-2.5	106.86	15.0092	21.3915
2.04	7.36347	-43.5176	-28.4729	21.5983	37.0056	1.46162	80	377.5	-2.5	107.52	15.0089	20.0777
2.06	7.78402	-42.8168	-28.4124	19.698	36.1232	5.08954	82.5	380	-2.5	106.934	15.0119	21.306
2.08	8.15166	-42.0689	-28.2697	18.2033	36.284	8.61705	85	380	-5	107.218	15.0063	20.5907
2.1	8.52074	-41.37	-28.0723	18.6462	35.1448	11.2299	90	380	-5	107.139	14.926	20
2.12	8.88844	-40.6511	-27.8202	17.2773	36.8892	14.3653	92.5	380	-7.5	106.894	14.8778	20.1493
2.14	9.20321	-39.9089	-27.5117	14.2541	35.4554	14.4867	95	380	-7.5	106.925	14.9356	20.5907
2.16	9.46483	-39.2336	-27.2321	12.6236	33.8429	16.5651	97.5	377.5	-7.5	107.864	14.9999	18.9931
2.18	9.71085	-38.5395	-26.8438	11.8487	34.9513	19.7875	100	377.5	-7.5	107.493	15.0118	20.0777
2.2	9.91994	-37.8182	-26.4531	6.96129	39.9436	20.2838	102.5	375	-7.5	107.798	15.009	19.4333
2.22	10.0004	-36.9744	-26.0292	4.9044	38.462	21.9738	105	372.5	-7.5	107.694	14.9998	19.4333
2.24	10.1107	-36.2994	-25.5836	1.39076	33.1627	21.6846	107.5	370	-7.5	107.148	14.9366	20.0777
2.26	10.0602	-35.6199	-25.1614	-1.27847	33.7549	21.8378	107.5	367.5	-7.5	107.414	14.8947	18.9931
2.28	10.0646	-34.9409	-24.7151	-2.7015	35.5173	20.9748	110	365	-7.5	106.987	14.9533	20.5907
2.3	9.93803	-34.2074	-24.3216	-7.30526	35.5297	20.4054	110	362.5	-7.5	107.355	14.9949	20.1493
2.32	9.78152	-33.5239	-23.899	-9.66123	34.5924	20.2555	110	360	-7.5	107.528	15.0116	20
2.34	9.54886	-32.8108	-23.5303	-12.8577	36.7576	16.1118	110	357.5	-7.5	107.496	15.0036	20.1493
2.36	9.26991	-32.07	-23.2457	-15.6394	35.1138	13.9402	110	355	-7.5	107.269	15.012	20.5907
2.38	8.93102	-31.3986	-22.9618	-16.9899	35.4067	14.0933	110	352.5	-7.5	106.856	15.0002	21.306
2.4	8.59226	-30.6537	-22.6969	-18.0205	35.6297	11.1094	110	350	-7.5	106.239	14.9638	22.2687
2.42	8.20522	-29.9773	-22.5224	-20.209	34.6807	7.24889	107.5	347.5	-7.5	106.399	14.8884	21.3915
2.44	7.78842	-29.2506	-22.3967	-21.5806	37.1926	5.78883	105	345	-7.5	106.67	14.9274	21.0906
2.46	7.35052	-28.4975	-22.3004	-21.2283	38.0312	2.15762	105	342.5	-7.5	105.871	14.9497	22.8949
2.48	6.93399	-27.7418	-22.3103	-22.1857	36.4857	-1.28697	102.5	342.5	-7.5	106.78	14.993	21.3915
2.5	6.46456	-27.0341	-22.3485	-23.1249	35.9539	-4.06797	100	340	-7.5	106.464	15.0118	22.2687
2.52	6.02527	-26.2997	-22.4726	-20.4131	36.0012	-6.91187	97.5	340	-7.5	106.962	15.0061	21.306
2.54	5.63069	-25.5898	-22.6227	-21.8306	36.9061	-9.24322	92.5	340	-10	107.379	15.001	20.1493
2.56	5.16223	-24.8277	-22.8449	-21.3076	36.9619	-12.2521	90	340	-10	107.281	14.9647	20
2.58	4.79958	-24.1159	-23.1083	-16.3313	36.0923	-14.2328	87.5	340	-10	106.99	14.9031	20.1493
2.6	4.49022	-23.3798	-23.4166	-15.5387	36.2792	-16.9733	85	340	-12.5	106.751	14.8878	20.5907
2.62	4.17416	-22.6688	-23.7805	-15.5205	35.7611	-18.3474	82.5	342.5	-12.5	107.757	14.978	18.9931
2.64	3.88811	-21.9574	-24.1495	-11.6634	33.744	-19.5758	80	345	-12.5	108.341	15.0117	17.9639
2.66	3.70759	-21.3191	-24.568	-8.16283	31.3237	-22.1481	77.5	345	-12.5	107.797	15.0067	19.4333
2.68	3.55693	-20.681	-25.018	-5.53231	33.6974	-21.1504	75	347.5	-12.5	107.756	15.0109	19.4333
2.7	3.48379	-19.9752	-25.4129	-3.34236	34.8732	-20.123	75	350	-12.5	108.255	15.0003	17.9639
2.72	3.42542	-19.2938	-25.8329	-0.905053	34.7212	-21.355	72.5	352.5	-12.5	107.568	14.9372	18.9931
2.74	3.45768	-18.5908	-26.2582	3.78547	34.0734	-20.6971	72.5	355	-12.5	107.809	14.9239	18.1788
2.76	3.56529	-17.9387	-26.6554	6.00389	31.4499	-19.1672	72.5	357.5	-12.5	108.244	14.9777	17.6721
2.78	3.6943	-17.3127	-27.0251	7.79069	32.9309	-17.9195	70	362.5	-12.5	107.509	15.0119	20.1493
2.8	3.87739	-16.6171	-27.3677	9.55357	35.117	-15.7584	70	365	-12.5	107.253	15.0046	20.5907
2.82	4.08466	-15.9207	-27.656	13.0514	34.6711	-13.9335	72.5	367.5	-12.5	107.923	15.0094	18.9931
2.84	4.39538	-15.2307	-27.9209	15.8332	34.4239	-11.4102	72.5	370	-12.5	107.354	14.9859	20.0777
2.86	4.70589	-14.5429	-28.1066	16.2957	34.149	-7.47439	72.5	372.5	-12.5	106.499	14.9381	21.3915
2.88	5.0472	-13.8563	-28.2334	17.1002	35.7501	-6.49221	75	375	-12.5	106.487	14.8761	21.0906
2.9	5.38831	-13.1213	-28.3625	17.4847	35.3598	-4.89487	77.5	375	-12.5	107.452	14.9474	19.4333
2.92	5.7507	-12.4383	-28.4105	18.9155	35.8907	0.571512	77.5	377.5	-12.5	106.659	14.9629	21.3915
2.94	6.13751	-11.6849	-28.3489	18.7374	36.5131	3.83055	80	380	-12.5	106.412	15.0064	22.2687
2.96	6.50107	-10.9784	-28.2615	18.9395	36.8662	6.61809	82.5	380	-12.5	106.951	15.0104	21.306
2.98	6.89431	-10.2057	-28.0894	19.3128	38.5336	8.47162	85	380	-12.5	107.29	15.0095	20.5907
3	7.25962	-9.45243	-27.9226	16.6726	36.9413	10.1027	90	380	-15	107.406	14.9925	20
3.02	7.57083	-8.72516	-27.6714	16.5169	36.1836	14.9649	92.5	380	-15	107.158	14.947	20.1493
3.04	7.91181	-8.00022	-27.342	14.6684	36.3208	15.7583	95	380	-17.5	106.839	14.9012	20.5907
3.06	8.14775	-7.27207	-27.0357	10.7275	36.395	18.1001	97.5	380	-17.5	106.444	14.8953	21.306
3.08	8.35459	-6.54473	-26.619	9.96094	36.6024	20.3354	100	377.5	-17.5	107.281	14.9818	20.0777
3.1	8.5385	-5.81605	-26.2316	7.34911	34.4047	20.5929	102.5	375	-17.5	107.783	15.012	19.4333
3.12	8.6472	-5.13659	-25.7901	4.52971	39.4783	22.344	105	372.5	-17.5	107.793	15.0098	19.4333
3.14	8.72487	-4.26402	-25.3469	2.99876	39.0458	22.1743	105	372.5	-17.5	107.799	15.0098	19.4333
3.16	8.75838	-3.60326	-24.9036	-0.39034	32.6925	22.2505	107.5	367.5	-17.5	107.726	14.9714	18.9931
3.18	8.70818	-2.92044	-24.4609	-3.80187	34.2206	21.3908	107.5	365	-17.5	107.852	14.9309	18.1788
3.2	8.6074	-2.23416	-24.0428	-6.95792	34.909	22.0299	110	362.5	-17.5	107.091	14.9301	20.1493
3.22	8.42953	-1.52414	-23.5944	-10.4353	35.6724	19.5027	110	360	-17.5	107.343	14.98	20
3.24	8.19902	-0.811031	-23.2587	-12.0899	35.8997	18.1054	110	357.5	-17.5	107.419	15.0068	20.1493
3.26	7.94561	-0.0967885	-22.8688	-13.8926	34.2789	17.2292	110	355	-17.5	107.285	15.0108	20.5907
3.28	7.63768	0.568718	-22.5832	-17.1816	34.4923	13.3689	107.5	352.5	-17.5	107.971	15.0113	18.9931
3.3	7.27305	1.28691	-22.3258	-17.2939	35.4998	11.8267	107.5	350	-17.5	107.447	15.0053	20.0777
3.32	6.94207	1.98041	-22.1234	-18.3977	34.5513	7.2046	105	347.5	-17.5	107.499	14.9592	19.4333
3.34	6.53126	2.67682	-22.0284	-20.9154	35.4871	4.52089	105	345	-17.5	106.558	14.8977	21.0906
3.36	6.11878	3.39569	-21.9332	-20.6276	35.3812	3.80972	102.5	342.5	-17.5	106.506	14.9202	21.3915
3.38	5.70645	4.09226	-21.8896	-20.5889	35.2154	0.291057	100	342.5	-17.5	107.31	14.9774	20.0777
3.4	5.29427	4.81238	-21.9271	-20.7757	36.7672	-4.2567	97.5	340	-17.5	106.911	15.0099	21.306
3.42	4.87644	5.55865	-22.0496	-20.9776	37.4536	-6.49592	95	340	-20	107.284	15.0111	20.5907
3.44	4.46484	6.30269	-22.1916	-19.2438	36.5788	-10.129	92.5	340	-20	107.489	15.0086	20.1493
3.46	4.10571	7.02583	-22.4466	-17.9493	36.6168	-12.0203	90	340	-20	107.501	15.0084	20
3.48	3.74692	7.77093	-22.6717	-16.7146	37.4561	-13.7179	87.5	340	-20	107.296	14.9806	20.1493
3.5	3.44089	8.51651	-23.0054	-14.6055	36.7056	-17.7018	85	340	-22.5	106.955	14.9464	20.5907
3.52	3.1578	9.23869	-23.3696	-14.0328	35.957	-19.6199	82.5	342.5	-22.5	107.453	14.9051	18.9931
3.54	2.89802	9.95862	-23.7814	-9.43163	36.1811	-20.1144	80	342.5	-22.5	107.198	14.9489	20.0777
3.56	2.77179	10.6781	-24.1712	-6.92309	34.8397	-20.1485	77.5	345	-22.5	107.714	15.0048	19.4333
3.58	2.61646	11.3484	-24.5904	-5.36027	32.6203	-20.6579	75	347.5	-22.5	107.802	15.0055	19.4333
3.6	2.56687	11.9951	-25.0064	-1.75774	32.7414	-23.1885	75	350	-22.5	108.372	15.0106	17.9639
3.62	2.54509	12.6656	-25.5048	1.48613	34.2691	-23.1774	72.5	352.5	-22.5	107.839	14.9958	18.9931
3.64	2.6227	13.3577	-25.9208	4.16159	33.8673	-20.9735	72.5	355	-22.5	108.004	14.965	18.1788
3.66	2.70643	14.0246	-26.3433	5.71332	34.7304	-18.9049	72.5	360	-22.5	108.254	14.9676	17.5
3.68	2.85882	14.739	-26.681	8.95429	33.9164	-17.647	72.5	362.5	-22.5	108.364	15.0009	17.6721
3.7	3.06283	15.381	-27.0495	11.8934	33.0422	-16.6981	72.5	365	-22.5	108.274	15.012	18.1788
3.72	3.32488	16.0689	-27.3349	12.8406	34.0079	-12.5672	72.5	367.5	-22.5	107.986	15.0013	18.9931
3.74	3.58047	16.7334	-27.5669	14.7179	32.8945	-11.8556	72.5	370	-22.5	107.502	15.012	20.0777
3.76	3.91822	17.3965	-27.8041	17.8527	34.3363	-10.0231	75	372.5	-22.5	107.626	14.9882	19.4333
3.78	4.27728	18.1069	-27.958	17.3106	35.7806	-6.33513	75	375	-22.5	106.73	14.9448	21.0906
3.8	4.61466	18.8161	-28.0578	17.9856	34.6235	-2.94057	77.5	377.5	-22.5	106.324	14.8664	21.3915
3.82	4.9975	19.5035	-28.0758	18.8472	36.2079	0.529328	80	380	-22.5	106.181	14.9496	22.2687
3.84	5.36348	20.26	-28.0415	18.6861	36.7956	2.91291	82.5	380	-22.5	106.824	14.9948	21.306
3.86	5.7445	20.968	-27.9545	18.7274	35.6195	6.38035	82.5	380	-22.5	106.832	14.9948	21.306
3.88	6.10597	21.7009	-27.7863	17.4968	38.1434	9.9471	87.5	382.5	-25	106.294	15.0066	22.6313
3.9	6.44279	22.4817	-27.5654	16.1069	38.055	11.6374	90	382.5	-25	106.35	15.0119	22.5
3.92	6.75056	23.2152	-27.3162	14.8196	36.5057	14.6932	92.5	382.5	-25	106.192	15.0001	22.6313
3.94	7.03563	23.9497	-26.9869	13.6308	36.7068	15.6801	95	380	-25	107.036	14.9651	20.5907
3.96	7.29196	24.6835	-26.6841	11.7951	36.718	17.7785	97.5	380	-27.5	106.598	14.9244	21.306
3.98	7.50257	25.4184	-26.2715	9.08998	36.6416	20.9469	100	377.5	-27.5	107.028	14.9057	20.0777
4	7.65532	26.153	-25.86	6.32952	37.6113	21.1318	102.5	377.5	-27.5	106.597	14.9455	21.3915
4.02	7.76087	26.9113	-25.4214	4.59149	35.6681	22.7414	102.5	375	-27.5	107.611	14.9858	19.4333
4.04	7.83924	27.5996	-24.9551	3.00923	38.2931	23.6138	105	372.5	-27.5	107.781	15.012	19.4333
4.06	7.872	28.4309	-24.49	-0.402356	38.7049	21.8585	107.5	370	-27.5	107.514	15.0102	20.0777
4.08	7.82212	29.1199	-24.0764	-3.82109	33.1327	21.0562	107.5	367.5	-27.5	107.919	15.0094	18.9931
4.1	7.7205	29.7842	-23.6381	-7.15994	33.7454	22.4304	107.5	365	-27.5	108.126	14.9906	18.1788
4.12	7.54431	30.4737	-23.1932	-8.69573	34.4717	20.8839	107.5	360	-27.5	108.103	14.9358	17.5
4.14	7.36785	31.163	-22.8078	-11.4352	35.0861	18.6534	107.5	357.5	-27.5	108.257	14.9814	17.6721
4.16	7.08789	31.8769	-22.4461	-13.9191	36.0495	16.7479	107.5	355	-27.5	108.211	15.0065	18.1788
4.18	6.81363	32.589	-22.1382	-16.1416	33.7271	14.9981	107.5	352.5	-27.5	107.971	15.0113	18.9931
4.2	6.45111	33.2304	-21.8556	-16.6799	32.1964	11.3594	105	350	-27.5	108.366	15.0114	17.9639
4.22	6.14755	33.8963	-21.6837	-16.9685	34.725	7.73017	105	347.5	-25	107.677	14.9985	19.4333
4.24	5.76249	34.6076	-21.5363	-19.6334	34.3093	6.36448	102.5	345	-27.5	107.49	14.9559	19.4333
4.26	5.3771	35.2725	-21.4385	-18.9501	34.8591	2.88533	100	342.5	-27.5	107.001	14.8982	20.0777
4.28	4.99948	36.006	-21.4218	-19.7039	36.4181	-0.539808	100	340	-27.5	106.023	14.9005	22.2687
4.3	4.59151	36.7177	-21.4603	-20.0654	35.2898	-4.13122	97.5	340	-27.5	106.708	14.9659	21.306
4.32	4.20676	37.4288	-21.5809	-18.4188	36.6779	-6.35786	95	340	-27.5	107.192	15.0029	20.5907
4.34	3.851	38.1848	-21.7197	-17.8339	38.2812	-9.72058	92.5	337.5	-27.5	106.281	15.0112	22.6313
4.36	3.4959	38.9406	-21.9712	-16.7818	35.604	-13.6178	90	337.5	-30	106.306	15.0018	22.5
4.38	3.18477	39.6248	-22.2498	-14.7215	36.4813	-14.3484	85	340	-30	107.056	14.9935	20.5907
4.4	2.90456	40.4037	-22.5538	-13.3454	38.0387	-17.1741	82.5	340	-30	106.547	14.9467	21.306
4.42	2.65345	41.1346	-22.9368	-11.6283	37.1449	-20.0985	80	340	-32.5	106.024	14.9005	22.2687
4.44	2.4482	41.8895	-23.3454	-7.90298	36.4439	-20.6898	77.5	342.5	-32.5	106.425	14.8978	21.3915
4.46	2.3247	42.596	-23.7593	-7.01078	36.4577	-20.3377	77.5	345	-32.5	107.489	14.9559	19.4333
4.48	2.17131	43.3482	-24.1678	-5.6538	36.6512	-21.8834	75	347.5	-32.5	107.718	15.006	19.4333
4.5	2.12095	44.0543	-24.635	0.308688	35.2002	-23.6219	72.5	350	-32.5	107.527	15.0055	20.0777
4.52	2.17503	44.7601	-25.099	4.44545	34.7169	-22.6923	72.5	352.5	-32.5	107.972	15.0113	18.9931
4.54	2.28039	45.4431	-25.5391	5.00684	34.0475	-21.2862	72.5	355	-32.5	108.209	15.0065	18.1788
4.56	2.38	46.1258	-25.9544	6.8212	34.2401	-20.9904	72.5	357.5	-32.5	108.262	14.9814	17.6721
4.58	2.55904	46.8087	-26.3698	9.91732	33.4373	-18.8305	72.5	360	-30	108.075	14.9173	17.5
4.6	2.76711	47.4674	-26.7071	10.6444	33.4471	-16.6731	72.5	365	-32.5	108.125	14.9906	18.1788
4.62	2.9971	48.1508	-27.0412	14.154	34.204	-15.7302	72.5	367.5	-30	108.022	15.0118	18.9931
4.64	3.32982	48.8355	-27.3238	17.1244	35.0421	-11.9585	72.5	370	-30	107.517	15.005	20.0777
4.66	3.66372	49.5445	-27.5282	16.2735	34.2903	-10.3554	75	372.5	-30	107.703	15.0105	19.4333
4.68	3.99024	50.2069	-27.7334	17.7704	33.4928	-7.8373	75	375	-30	106.968	14.9934	21.0906
4.7	4.37484	50.8928	-27.8325	19.4052	34.5305	-3.36288	77.5	377.5	-30	106.604	14.9231	21.3915
4.72	4.75383	51.5836	-27.8775	18.5099	34.2457	-1.17531	80	377.5	-32.5	107.03	14.9057	20.0777
4.74	5.11521	52.2703	-27.874	17.757	35.5985	2.49185	82.5	380	-32.5	106.567	14.9244	21.306
4.76	5.47084	53.0081	-27.7827	18.5169	37.193	5.06331	85	380	-32.5	107.1	14.9808	20.5907
4.78	5.84922	53.7457	-27.6722	17.9865	36.1063	7.55565	87.5	382.5	-32.5	106.232	15.0079	22.6313
4.8	6.18185	54.4603	-27.4788	15.8381	36.8047	10.529	90	382.5	-32.5	106.356	15.0089	22.5
4.82	6.48652	55.2223	-27.2563	14.635	38.5947	12.2048	92.5	382.5	-35	106.297	15.0066	22.6313
4.84	6.7681	55.988	-26.9822	13.647	36.8685	16.1063	95	380	-35	107.233	15.0091	20.5907
4.86	7.02683	56.7046	-26.629	11.6165	37.1477	16.2084	97.5	380	-35	106.776	14.982	21.306
4.88	7.22902	57.4702	-26.3258	9.0735	36.4935	18.2318	100	377.5	-35	107.084	14.9217	20.0777
4.9	7.38593	58.1641	-25.8949	5.86454	35.5787	21.4467	102.5	377.5	-37.5	106.319	14.8664	21.3915
4.92	7.46327	58.9053	-25.4851	2.36804	37.1551	21.0271	105	375	-37.5	106.739	14.9448	21.0906
4.94	7.4933	59.6462	-25.0502	1.52735	37.4199	21.7298	105	372.5	-37.5	107.624	14.9882	19.4333
4.96	7.51964	60.4102	-24.6151	-0.276994	40.1115	22.7264	107.5	370	-37.5	107.503	15.012	20.0777
4.98	7.47039	61.2229	-24.1503	-4.43236	37.1487	22.0006	107.5	367.5	-37.5	107.985	15.0013	18.9931
5	7.34649	61.8917	-23.74	-7.56217	33.295	20.2891	107.5	365	-35	108.253	15.0106	18.1788
5.02	7.17182	62.5823	-23.3296	-9.89193	35.3734	20.7515	107.5	362.5	-35	108.314	14.9923	17.6721
5.04	6.94604	63.295	-22.9185	-13.5079	34.3414	19.3745	107.5	360	-35	108.178	14.9526	17.5
5.06	6.64089	63.9601	-22.559	-15.3332	34.1321	17.3483	107.5	355	-35	108.066	14.9789	18.1788
5.08	6.34093	64.6718	-22.2254	-15.6397	36.5089	15.603	107.5	352.5	-35	107.881	15.004	18.9931
5.1	6.01091	65.4047	-21.9477	-17.0317	35.6412	11.0784	105	350	-35	108.382	15.0065	17.9639
5.12	5.65968	66.0894	-21.773	-18.3042	33.2631	8.53356	105	347.5	-35	107.814	15.0103	19.4333
5.14	5.27847	66.747	-21.5985	-19.7584	33.4382	7.75962	102.5	345	-35	107.666	14.9967	19.4333
5.16	4.87442	67.4273	-21.48	-20.3798	33.1969	3.28439	100	342.5	-35	107.121	14.9285	20.0777
5.18	4.47088	68.0826	-21.4661	-19.5097	34.4867	-0.75063	97.5	342.5	-37.5	107.45	14.9051	18.9931
5.2	4.09016	68.8068	-21.5016	-19.7237	35.692	-3.25632	95	340	-37.5	106.949	14.9464	20.5907
5.22	3.68669	69.5063	-21.5918	-18.9866	36.1153	-4.83134	92.5	340	-37.5	107.344	14.993	20.1493
5.24	3.33459	70.2513	-21.7044	-17.5648	36.8094	-8.41624	90	337.5	-37.5	106.322	15.0107	22.5
5.26	2.98316	70.9711	-21.9282	-16.5447	35.7794	-11.9358	87.5	337.5	-40	106.28	15.0106	22.6313
5.28	2.67742	71.6906	-22.1728	-14.5999	36.6702	-13.6566	85	337.5	-40	106.077	15.0098	23.0207
5.3	2.40007	72.4336	-22.4749	-12.5906	36.3893	-15.5884	82.5	340	-40	106.872	15.0041	21.306
5.32	2.17387	73.1502	-22.8004	-10.5657	37.0077	-18.4373	80	340	-40	106.257	14.9692	22.2687
5.34	1.9765	73.9142	-23.2079	-8.80773	37.6917	-20.4094	77.5	342.5	-42.5	106.509	14.9202	21.3915
5.36	1.82464	74.654	-23.612	-6.68486	37.6763	-21.7426	75	345	-42.5	106.566	14.8977	21.0906
5.38	1.72002	75.4179	-24.0696	-2.21951	37.1039	-21.5837	75	345	-40	106.651	14.9226	21.0906
5.4	1.72643	76.1376	-24.4755	0.199437	36.4205	-21.5492	72.5	347.5	-42.5	106.705	14.9761	21.3915
5.42	1.72353	76.8785	-24.9358	1.61376	36.6608	-22.6673	72.5	350	-40	107.476	15.0103	20.0777
5.44	1.80479	77.5973	-25.3695	6.27443	35.4785	-20.9368	72.5	352.5	-40	107.981	15.0078	18.9931
5.46	1.95958	78.2968	-25.7815	7.48979	34.1017	-21.2992	72.5	357.5	-40	108.397	15.0071	17.6721
5.48	2.10901	78.9692	-26.2165	9.86646	34.2052	-20.6454	72.5	360	-40	108.305	14.9806	17.5
5.5	2.35975	79.6696	-26.5994	13.441	35.2484	-18.5369	72.5	362.5	-40	108.024	14.931	17.6721
5.52	2.63816	80.3712	-26.958	15.4063	34.6675	-16.8731	72.5	365	-40	107.937	14.949	18.1788
5.54	2.96693	81.0525	-27.265	15.7474	33.2239	-13.2314	72.5	367.5	-40	107.788	14.9849	18.9931
5.56	3.26892	81.7116	-27.4917	16.3122	34.1829	-10.5939	75	370	-40	108.359	15.012	17.9639
5.58	3.62653	82.4199	-27.6935	18.5778	35.167	-9.00823	77.5	372.5	-40	108.509	15.0102	17.607
5.6	4.00002	83.1065	-27.8434	18.2554	33.4911	-5.47726	77.5	375	-40	107.747	15.0099	19.4333
5.62	4.35701	83.7712	-27.9165	18.1971	34.5351	-2.93832	80	377.5	-40	107.265	14.9667	20.0777
5.64	4.73152	84.4843	-27.9609	19.0245	34.5559	-0.514081	82.5	380	-40	106.362	14.8674	21.306
5.66	5.1112	85.1536	-27.9282	18.4461	34.5011	3.80684	85	380	-42.5	106.833	14.9012	20.5907
5.68	5.46765	85.872	-27.8135	17.9244	35.989	7.14125	87.5	380	-42.5	107.228	14.9652	20.1493
5.7	5.81898	86.5928	-27.651	15.4495	37.4095	8.76611	90	382.5	-42.5	106.237	14.9962	22.5
5.72	6.09196	87.3606	-27.4574	14.4706	37.4909	11.7169	92.5	382.5	-42.5	106.266	15.0119	22.6313
5.74	6.39781	88.0842	-27.1835	13.5842	35.8276	14.526	95	380	-42.5	107.297	15.0069	20.5907
5.76	6.62531	88.8055	-26.8856	10.5568	36.6153	15.2707	97.5	380	-42.5	106.909	15.0099	21.306
5.78	6.82553	89.5531	-26.5628	9.08271	38.3788	18.3178	100	380	-45	106.381	14.9978	22.2687
5.8	6.98012	90.3242	-26.1572	5.68515	36.6599	20.6092	102.5	377.5	-45	106.591	14.943	21.3915
5.82	7.05649	91.0233	-25.7521	3.18124	35.815	20.0537	105	375	-45	106.477	14.8703	21.0906
5.84	7.10848	91.7691	-25.3461	0.832275	37.2485	21.7397	105	372.5	-45	107.434	14.941	19.4333
5.86	7.08894	92.5163	-24.8871	-1.59617	39.1745	22.6119	107.5	370	-45	107.402	14.9971	20.0777
5.88	7.04001	93.3282	-24.4546	-5.15978	39.9139	20.8035	107.5	367.5	-45	107.949	15.0118	18.9931
5.9	6.89177	94.0942	-24.0467	-6.54658	36.9617	21.0725	110	365	-45	107.298	15.0061	20.5907
5.92	6.76944	94.8132	-23.6156	-10.0001	35.6844	20.5693	110	362.5	-45	107.454	15.011	20.1493
5.94	6.49554	95.5255	-23.2326	-12.6984	34.8175	18.3251	110	360	-45	107.407	14.9925	20
5.96	6.27024	96.2141	-22.8784				107.5	357.5	-45	108.177	14.9641	17.6721
5.98	5.9458	96.9455	-22.5473				107.5	355	-45	107.765	14.9111	18.1788

## Sheet: Zigzag
	Displacement (mm)			Velocity (mm/s)			Euler angles (o)
t (s)	x	y	z	dx/dt	dy/dt	dz/dt	1	2	3	A (mm^2)	D(mm)	Inc_angles
0	15.0571	-115.913	-21.035				110	337.5	40	131.331	15.0119	29.7542
0.02	14.6792	-114.848	-21.5225				107.5	340	40	134.96	15.0103	26.3369
0.04	14.2469	-113.874	-22.0354	-23.2278	48.1482	-26.6511	105	342.5	40	138.129	15.0072	22.8949
0.06	13.7603	-112.919	-22.5869	-24.4932	47.1698	-27.9758	102.5	347.5	40	142.004	15.0115	17.607
0.08	13.2804	-112.036	-23.154	-23.2163	35.0938	-29.4375	97.5	347.5	40	143.692	15.012	14.5466
0.1	12.8253	-111.471	-23.7571	-23.6573	31.9128	-29.6156	92.5	355	35	146.314	15.0071	5.58875
0.12	12.3393	-110.715	-24.332	-23.2616	38.2909	-28.8566	90	357.5	37.5	146.369	15.0119	2.5
0.14	11.9092	-110.003	-24.9037	-20.131	30.9957	-27.2247	87.5	362.5	37.5	146.414	15.0114	3.53497
0.16	11.5339	-109.478	-25.4012	-17.2479	23.8611	-21.6939	85	365	37.5	146.131	15.0079	7.06657
0.18	11.2141	-109.014	-25.7762	-15.6209	23.2588	-17.3584	82.5	370	37.5	144.635	15.0013	12.4771
0.2	10.9177	-108.535	-26.1055	-12.514	24.2485	-15.0082	80	372.5	37.5	142.98	15.005	15.9579
0.22	10.7286	-108.042	-26.3722	-6.25299	24.9728	-11.7904	75	375	40	139.573	15.012	21.0906
0.24	10.6534	-107.516	-26.5671	-2.96666	29.6232	-6.48828	75	380	37.5	136.429	15.0043	24.8142
0.26	10.5998	-106.855	-26.6392	-1.40061	34.5145	-2.74895	72.5	382.5	37.5	133.023	15.0093	28.2223
0.28	10.5994	-106.151	-26.6842	0.773508	35.9343	-0.523152	70	382.5	40	131.336	15.0119	29.7542
0.3	10.6331	-105.407	-26.6496	3.37362	39.6666	4.317	70	385	40	129.179	15.0064	31.6083
0.32	10.7342	-104.554	-26.5247	5.93271	45.3902	6.32374	67.5	385	42.5	127.284	15.0103	33.1419
0.34	10.8685	-103.604	-26.3995	8.03888	48.5054	7.58184	67.5	385	42.5	127.286	15.0103	33.1419
0.36	11.0589	-102.619	-26.2011	10.8044	50.9268	13.3003	67.5	387.5	40	124.915	15.0106	34.9661
0.38	11.3009	-101.569	-25.8802	13.6622	53.2205	16.0343	67.5	385	42.5	127.284	15.0103	33.1419
0.4	11.6004	-100.499	-25.5621	15.6669	54.1602	18.4676	70	385	40	129.176	15.0064	31.6083
0.42	11.922	-99.4107	-25.136	16.5238	53.8925	22.3968	72.5	382.5	40	133.021	15.0048	28.2223
0.44	12.2679	-98.351	-24.6802	18.9565	52.4287	23.1779	75	380	37.5	136.424	15.0043	24.8142
0.46	12.6752	-97.3216	-24.1996	20.1024	49.7543	26.1671	77.5	377.5	37.5	139.352	15.0051	21.3915
0.48	13.0759	-96.3691	-23.6336	22.3433	45.7899	29.1213	80	375	35	141.791	15.0033	17.9639
0.5	13.561	-95.4967	-23.0438	23.0304	40.5608	30.511	82.5	372.5	35	143.714	15.0082	14.5466
0.52	13.992	-94.7415	-22.4225	23.039	36.7273	30.5155	85	367.5	35	145.744	15.0021	9.00594
0.54	14.4774	-94.0355	-21.8331	22.5569	31.6596	28.8718	87.5	362.5	35	146.41	15.0116	3.53497
0.56	14.8775	-93.4939	-21.2719	18.6141	20.9954	26.6929	90	360	35	146.148	15	1.44653e-14
0.58	15.231	-93.1142	-20.7686	16.9296	27.4046	23.9903	92.5	357.5	35	146.414	15.0116	3.53497
0.6	15.5537	-92.4099	-20.3131	14.8929	30.8641	21.4849	95	350	35	145.101	15.011	11.169
0.62	15.8237	-91.9404	-19.92	12.543	21.2348	16.9143	100	347.5	35	142.973	15.0094	15.9579
0.64	16.0446	-91.5111	-19.6393	7.86827	22.4091	11.9301	102.5	345	35	140.78	15.0118	19.4333
0.66	16.1479	-91.0203	-19.4375	5.4694	27.0961	8.09632	105	342.5	37.5	138.122	15.0115	22.8949
0.68	16.2595	-90.427	-19.3163	2.28735	31.3335	3.94549	107.5	340	37.5	134.949	15.0119	26.3369
0.7	16.2302	-89.7707	-19.2798	-3.2298	34.7687	-0.450283	110	337.5	40	131.334	15.0119	29.7542
0.72	16.1538	-89.0342	-19.3244	-3.68865	38.5943	-2.83809	110	335	37.5	129.168	15.0118	31.6083
0.74	16.0774	-88.2223	-19.3937	-5.66412	43.2746	-5.42362	112.5	335	40	127.19	15.0114	33.1419
0.76	15.922	-87.3029	-19.5466	-8.74514	48.2196	-9.17904	112.5	332.5	40	124.918	15.0106	34.9661
0.78	15.7355	-86.3064	-19.7561	-10.1273	50.7886	-11.8716	112.5	332.5	40	124.916	15.0106	34.9661
0.8	15.518	-85.2797	-20.0207	-11.4224	52.0087	-14.4109	112.5	332.5	40	124.916	15.0106	34.9661
0.82	15.2761	-84.2257	-20.3374	-12.9752	53.6992	-17.826	110	335	37.5	129.172	15.0118	31.6083
0.84	14.9876	-83.1389	-20.7383	-16.866	54.2887	-22.3711	110	337.5	40	131.331	15.0119	29.7542
0.86	14.6065	-82.0678	-21.2187	-19.721	52.4176	-23.9767	107.5	337.5	37.5	133.021	15.0093	28.2223
0.88	14.2091	-81.046	-21.7024	-20.4889	50.3204	-26.9281	105	342.5	37.5	138.125	15.0115	22.8949
0.9	13.7809	-80.0629	-22.2955	-23.0669	46.993	-30.2597	102.5	345	37.5	140.8	15.009	19.4333
0.92	13.3002	-79.1771	-22.8895	-22.876	42.1955	-28.6737	100	347.5	35	142.976	15.0094	15.9579
0.94	12.871	-78.3946	-23.4535	-21.7452	32.9653	-30.1429	95	350	35	145.097	15.011	11.169
0.96	12.4207	-77.8259	-24.0849	-23.1209	29.7567	-29.5421	92.5	357.5	35	146.414	15.0116	3.53497
0.98	11.9639	-77.1649	-24.6242	-20.8674	34.9549	-27.0784	90	360	35	146.142	15	1.44653e-14
1	11.5923	-76.4814	-25.1651	-17.6436	28.2379	-24.6424	87.5	365	35	146.312	15.0071	5.58875
1.02	11.2518	-76.0285	-25.5963	-16.0671	23.4187	-19.209	85	367.5	35	145.746	15.0021	9.00594
1.04	10.9585	-75.5113	-25.9475	-12.4537	25.2953	-17.0772	82.5	372.5	35	143.715	15.0082	14.5466
1.06	10.7498	-75.0246	-26.2732	-9.80592	24.164	-13.6959	80	375	35	141.792	15.0033	17.9639
1.08	10.5649	-74.5216	-26.4817	-7.46052	27.8541	-7.3788	77.5	377.5	35	139.358	15.006	21.3915
1.1	10.4566	-73.9098	-26.5829	-4.07869	31.1801	-4.07701	75	380	37.5	136.425	15.0043	24.8142
1.12	10.4033	-73.2779	-26.6543	-0.253798	33.5036	-2.6564	72.5	382.5	37.5	133.023	15.0093	28.2223
1.14	10.4357	-72.558	-26.6751	1.41083	38.3513	1.6809	72.5	385	37.5	130.795	15.0062	30.1902
1.16	10.4587	-71.7476	-26.5813	2.85536	42.0501	7.31237	70	385	40	129.18	15.0064	31.6083
1.18	10.5616	-70.8718	-26.4025	6.91303	46.9597	8.8011	70	385	37.5	129.176	15.0118	31.6083
1.2	10.7255	-69.8806	-26.2286	8.87171	49.7967	10.5609	70	387.5	37.5	126.784	15.0069	33.5382
1.22	10.9105	-68.8923	-25.9661	9.60335	50.2466	15.3452	70	385	40	129.183	15.0064	31.6083
1.24	11.1204	-67.8626	-25.6245	12.7341	52.8051	17.9767	70	385	40	129.174	15.0064	31.6083
1.26	11.4158	-66.7876	-25.2521	14.929	54.0733	19.6043	72.5	382.5	37.5	133.019	15.0093	28.2223
1.28	11.712	-65.7162	-24.831	15.8034	52.3248	23.4202	75	382.5	35	134.476	15.0024	26.8237
1.3	12.0606	-64.6983	-24.3235	19.6643	50.4314	25.4746	77.5	380	35	137.65	15.0082	23.4485
1.32	12.486	-63.7064	-23.8172	20.9099	47.3379	26.6135	80	377.5	35	140.338	15.0113	20.0777
1.34	12.8883	-62.8129	-23.2552	20.6378	42.6983	28.7633	82.5	372.5	35	143.714	15.0082	14.5466
1.36	13.3152	-61.9939	-22.6715	21.4558	39.3743	30.0259	85	370	32.5	145.111	15.0091	11.169
1.38	13.7413	-61.246	-22.0616	21.4126	34.6832	30.3918	87.5	365	32.5	146.321	15.0053	5.58875
1.4	14.1602	-60.621	-21.4745	19.3886	25.8746	27.2016	90	362.5	32.5	146.354	15.0119	2.5
1.42	14.5095	-60.1533	-20.9733	16.0244	29.198	24.4421	92.5	357.5	32.5	146.394	15.0118	3.53497
1.44	14.8072	-59.4627	-20.4933	14.1472	30.1376	22.7329	97.5	352.5	32.5	145.266	15.012	10.5914
1.46	15.0714	-58.9874	-20.0781	11.4159	22.3971	17.9374	100	350	35	143.891	15.0118	14.106
1.48	15.2602	-58.5263	-19.7695	8.02817	23.4526	14.7755	102.5	347.5	32.5	141.951	15.0048	17.607
1.5	15.3935	-58.0375	-19.4872	5.08861	25.4149	12.0107	105	342.5	35	138.107	15.0114	22.8949
1.52	15.4575	-57.4923	-19.3118	0.810538	30.703	4.13788	107.5	340	35	134.931	15.0079	26.3369
1.54	15.4284	-56.8144	-19.2997	-3.23709	34.7711	0.892666	110	337.5	37.5	131.321	15.0096	29.7542
1.56	15.3448	-56.1107	-19.2624	-3.98083	36.7966	0.399873	110	335	37.5	129.169	15.0118	31.6083
1.58	15.269	-55.3298	-19.3058	-4.91432	41.7133	-5.08968	112.5	335	40	127.303	15.0114	33.1419
1.6	15.138	-54.4464	-19.4568	-7.99274	45.4714	-8.5257	112.5	332.5	40	124.913	15.0106	34.9661
1.62	14.9535	-53.5115	-19.6336	-10.1035	49.2026	-9.09861	112.5	332.5	40	124.916	15.0106	34.9661
1.64	14.7387	-52.4777	-19.839	-11.3973	53.5781	-13.6535	112.5	332.5	40	124.912	15.0106	34.9661
1.66	14.499	-51.3886	-20.1794	-12.4082	54.1185	-17.9866	110	332.5	37.5	126.785	15.0069	33.5382
1.68	14.2374	-50.3215	-20.546	-14.4049	53.5558	-19.633	110	335	37.5	129.174	15.0118	31.6083
1.7	13.9212	-49.2505	-20.9727	-16.5941	52.3787	-23.203	107.5	337.5	35	133.014	15.012	28.2223
1.72	13.5738	-48.2261	-21.4739	-18.7627	51.5639	-26.7359	105	340	35	136.426	15.0106	24.8142
1.74	13.1733	-47.1962	-22.0344	-20.3968	49.4875	-28.7345	102.5	342.5	35	139.354	15.006	21.3915
1.76	12.757	-46.2629	-22.6224	-22.4427	44.5818	-31.0937	100	347.5	35	142.984	15.0094	15.9579
1.78	12.2817	-45.4221	-23.2646	-23.8452	38.3947	-30.9682	97.5	350	32.5	144.627	15.0085	12.4771
1.8	11.8273	-44.7327	-23.8528	-20.304	30.2649	-29.4234	92.5	352.5	32.5	145.951	15.0117	7.90343
1.82	11.4585	-44.1691	-24.445	-19.3766	30.8622	-29.0128	90	357.5	32.5	146.352	15.0119	2.5
1.84	11.0445	-43.5022	-25.0044	-20.3785	30.0866	-27.0487	87.5	362.5	32.5	146.41	15.0118	3.53497
1.86	10.67	-42.9849	-25.5145	-15.901	24.9443	-22.8436	85	365	32.5	146.113	15.0108	7.06657
1.88	10.4096	-42.4803	-25.917	-11.5035	25.0513	-18.5001	82.5	370	32.5	144.631	15.0085	12.4771
1.9	10.1957	-41.9811	-26.2632	-9.99218	24.7249	-16.2457	80	372.5	32.5	142.973	15.0117	15.9579
1.92	10.0114	-41.4838	-26.5538	-8.14007	25.4865	-11.1714	77.5	375	35	140.814	15.0118	19.4333
1.94	9.88178	-40.9465	-26.7099	-3.98155	29.0665	-5.9639	75	377.5	35	138.106	15.0114	22.8949
1.96	9.85183	-40.3202	-26.8098	0.205806	32.4533	-4.58382	75	380	37.5	136.429	15.0043	24.8142
1.98	9.87503	-39.6483	-26.88	1.31255	35.6216	-0.110252	72.5	382.5	37.5	133.024	15.0093	28.2223
2	9.90792	-38.8873	-26.8146	3.36718	40.4874	4.18546	72.5	385	35	130.847	15.0092	30.1902
2.02	10.0155	-38.0325	-26.7217	6.88225	44.6134	6.66108	72.5	385	35	130.844	15.0092	30.1902
2.04	10.1674	-37.1104	-26.5477	6.83629	47.2963	9.56922	70	385	37.5	129.175	15.0118	31.6083
2.06	10.2992	-36.1404	-26.3434	9.2675	50.4268	11.2297	72.5	385	37.5	130.907	15.0062	30.1902
2.08	10.5373	-35.1019	-26.0848	11.2886	52.1374	15.8713	72.5	385	35	130.845	15.0092	30.1902
2.1	10.7501	-34.067	-25.714	13.3179	51.8297	19.2035	72.5	382.5	37.5	133.024	15.0093	28.2223
2.12	11.0653	-33.036	-25.322	14.5193	50.2531	21.6877	75	382.5	35	134.481	15.0024	26.8237
2.14	11.3275	-32.0524	-24.8492	14.9361	49.9828	23.5474	77.5	380	32.5	137.658	15.0036	23.4485
2.16	11.6717	-31.0459	-24.3714	17.342	47.9462	27.5878	80	377.5	32.5	140.344	15.0073	20.0777
2.18	12.0165	-30.1416	-23.7607	18.7056	44.8019	28.7567	82.5	375	32.5	142.53	15.0112	16.7319
2.2	12.4148	-29.2569	-23.2345	19.3512	41.5254	27.3658	85	370	30	145.115	15.006	11.169
2.22	12.7827	-28.4933	-22.6561	18.7231	35.7825	28.4083	87.5	367.5	30	145.956	15.0109	7.90343
2.24	13.1575	-27.8254	-22.1024	16.9031	29.465	28.6939	90	362.5	30	146.227	15.0119	2.5
2.26	13.4644	-27.2773	-21.5219	16.6305	30.797	26.741	90	360	30	146.025	15	1.44653e-14
2.28	13.8111	-26.6009	-21.0474	14.1375	30.2442	22.1969	95	355	30	146.099	15.0116	7.06657
2.3	14.0202	-26.0887	-20.6339	9.8045	24.9415	17.8982	97.5	350	30	144.622	15.0109	12.4771
2.32	14.2114	-25.575	-20.3263	7.46963	25.8196	14.3949	100	347.5	32.5	142.974	15.0117	15.9579
2.34	14.3141	-25.0559	-20.0484	3.80688	25.5765	13.2857	102.5	345	32.5	140.779	15.0114	19.4333
2.36	14.3694	-24.5354	-19.8175	1.21976	28.2411	7.42328	105	340	35	136.425	15.0106	24.8142
2.38	14.3708	-23.9105	-19.7523	-0.0714843	33.873	1.52457	105	337.5	32.5	134.474	15.0101	26.8237
2.4	14.3718	-23.1892	-19.7391	-0.059888	37.3594	-0.916886	107.5	335	35	130.844	15.0092	30.1902
2.42	14.3504	-22.4157	-19.7871	-3.95954	41.148	-3.3022	110	335	35	129.157	15.0095	31.6083
2.44	14.221	-21.5437	-19.8761	-5.91367	44.8446	-6.68356	110	332.5	35	126.775	15.012	33.5382
2.46	14.1142	-20.6217	-20.0555	-8.00908	48.6958	-10.0835	110	332.5	35	126.776	15.012	33.5382
2.48	13.9017	-19.5997	-20.2825	-10.0099	52.0894	-14.2651	110	332.5	35	126.777	15.012	33.5382
2.5	13.7185	-18.5508	-20.6183	-10.9633	53.2496	-16.9123	110	332.5	35	126.776	15.012	33.5382
2.52	13.4575	-17.4778	-20.9549	-13.1947	53.2082	-18.5003	107.5	335	35	130.841	15.0092	30.1902
2.54	13.1919	-16.4262	-21.3756	-15.1283	52.7263	-24.0897	107.5	337.5	35	133.01	15.012	28.2223
2.56	12.8558	-15.3732	-21.9002	-16.629	51.6403	-25.7066	105	340	32.5	136.409	15.0118	24.8142
2.58	12.5358	-14.3686	-22.3997	-16.0105	49.1583	-26.6189	102.5	342.5	32.5	139.349	15.0108	21.3915
2.6	12.1992	-13.4107	-22.9787	-19.1368	46.4207	-30.7016	100	345	32.5	141.8	15.0059	17.9639
2.62	11.7817	-12.5245	-23.6144	-19.8779	41.7617	-32.2026	97.5	350	30	144.616	15.0109	12.4771
2.64	11.4163	-11.7607	-24.2494	-18.2879	32.6174	-30.8233	95	352.5	30	145.752	15.0057	9.00594
2.66	11.0431	-11.1914	-24.8372	-18.7797	28.9457	-27.6495	90	355	30	146.338	15.0119	5
2.68	10.6791	-10.5744	-25.3636	-16.2729	30.8834	-26.3013	87.5	362.5	30	146.414	15.0119	3.53497
2.7	10.391	-9.98066	-25.8917	-14.349	27.1132	-25.9259	85	365	30	146.108	15.0116	7.06657
2.72	10.1049	-9.48691	-26.373	-12.7631	23.9597	-20.0124	85	370	30	145.111	15.006	11.169
2.74	9.89343	-8.99869	-26.6901	-8.5006	25.3318	-13.876	82.5	372.5	30	143.713	15.0038	14.5466
2.76	9.76208	-8.46894	-26.9475	-4.87403	26.934	-11.8068	77.5	375	32.5	140.781	15.0114	19.4333
2.78	9.68843	-7.9165	-27.1577	-3.16365	29.0987	-8.69292	77.5	380	30	137.649	15.01	23.4485
2.8	9.63468	-7.29364	-27.2804	-1.61372	33.4122	-2.3713	75	382.5	32.5	134.473	15.0101	26.8237
2.82	9.63354	-6.57997	-27.2674	1.97865	37.6514	0.752465	72.5	382.5	35	133.01	15.012	28.2223
2.84	9.71019	-5.79556	-27.2557	4.93206	40.2737	3.04212	72.5	385	35	130.84	15.0092	30.1902
2.86	9.81762	-4.96821	-27.1401	5.3678	43.0571	6.56631	72.5	387.5	32.5	128.423	15.0099	32.2254
2.88	9.92365	-4.06525	-26.992	5.6591	47.3481	10.0507	72.5	387.5	32.5	128.426	15.0099	32.2254
2.9	10.053	-3.07123	-26.7342	7.56807	52.6264	14.6242	72.5	387.5	32.5	128.426	15.0099	32.2254
2.92	10.2348	-1.98329	-26.4212	11.0131	53.5071	16.163	72.5	387.5	32.5	128.424	15.0099	32.2254
2.94	10.4902	-0.942801	-26.0834	13.9061	52.4966	18.6943	72.5	385	35	130.845	15.0092	30.1902
2.96	10.7787	0.120451	-25.6643	14.467	52.6508	23.2828	75	385	32.5	132.284	15.0033	28.9046
2.98	11.0671	1.1595	-25.1656	14.7561	52.2624	24.9497	77.5	382.5	30	135.7	15.0026	25.5805
3	11.3775	2.19891	-24.6666	16.8581	49.7544	26.7946	80	380	30	138.648	15.0093	22.2687
3.02	11.7391	3.14187	-24.0893	18.5182	45.8822	29.7605	80	375	30	141.787	15.0103	17.9639
3.04	12.1087	4.03841	-23.485	18.3591	43.1613	30.9549	82.5	372.5	30	143.721	15.0038	14.5466
3.06	12.4722	4.86381	-22.8554	18.2536	39.932	31.7535	85	367.5	30	145.737	15.0057	9.00594
3.08	12.836	5.61568	-22.2241	17.8272	31.9782	31.0257	87.5	365	30	146.317	15.0033	5.58875
3.1	13.177	6.1763	-21.6233	15.8287	31.2058	28.972	90	360	30	146.214	15	1.44653e-14
3.12	13.4685	6.86357	-21.0746	13.9392	30.2508	25.2486	95	355	27.5	146.089	15.0119	7.06657
3.14	13.7329	7.35754	-20.6128	11.7986	22.5338	21.8435	97.5	352.5	30	145.251	15.0114	10.5914
3.16	13.9379	7.8054	-20.1997	9.19839	23.5277	18.9126	97.5	347.5	30	143.719	15.0038	14.5466
3.18	14.1002	8.30287	-19.8666	6.65046	24.1554	13.7732	102.5	345	30	140.759	15.0079	19.4333
3.2	14.1997	8.77953	-19.6438	3.15212	25.771	10.0961	102.5	340	30	137.649	15.01	23.4485
3.22	14.2316	9.35328	-19.471	0.660375	31.2027	4.42821	105	337.5	30	134.459	15.0119	26.8237
3.24	14.2323	10.0236	-19.4582	-0.663248	35.4415	0.441633	107.5	335	32.5	130.832	15.0119	30.1902
3.26	14.2028	10.7669	-19.4448	-2.58879	38.7786	-1.83142	107.5	332.5	32.5	128.424	15.0099	32.2254
3.28	14.1286	11.5829	-19.5399	-4.49234	44.0403	-6.22977	110	332.5	32.5	126.762	15.0084	33.5382
3.3	14.0228	12.5204	-19.685	-6.33312	47.6659	-8.39951	110	330	32.5	124.152	15.0119	35.5313
3.32	13.8707	13.4816	-19.8853	-9.26505	49.8201	-13.0168	110	330	32.5	124.151	15.0119	35.5313
3.34	13.66	14.5168	-20.1918	-10.569	53.1797	-14.3951	110	330	32.5	124.151	15.0119	35.5313
3.36	13.4496	15.5969	-20.4703	-11.7381	54.178	-17.6202	110	332.5	32.5	126.753	15.0084	33.5382
3.38	13.1904	16.6801	-20.9098	-12.8324	54.9397	-23.9115	107.5	335	32.5	130.834	15.0119	30.1902
3.4	12.9313	17.7859	-21.4005	-15.0134	54.3511	-24.2867	105	335	32.5	132.285	15.0033	28.9046
3.42	12.5935	18.8427	-21.8947	-16.476	51.8034	-28.1182	105	340	32.5	136.409	15.0118	24.8142
3.44	12.2775	19.8535	-22.5205	-16.687	48.8362	-30.8868	102.5	342.5	30	139.335	15.0119	21.3915
3.46	11.9141	20.7882	-23.1216	-19.8336	44.4702	-32.1641	97.5	345	27.5	142.547	15.0025	16.7319
3.48	11.5009	21.6287	-23.8026	-19.6418	39.7922	-32.9847	97.5	350	30	144.621	15.0109	12.4771
3.5	11.1403	22.3714	-24.4323	-17.2755	33.0974	-32.3109	95	355	27.5	146.084	15.0119	7.06657
3.52	10.8011	22.969	-25.0901	-17.0967	29.9025	-31.1961	92.5	357.5	30	146.369	15.0119	3.53497
3.54	10.4619	23.5674	-25.667	-15.8193	26.0814	-27.6644	87.5	362.5	30	146.423	15.0119	3.53497
3.56	10.177	24.02	-26.1926	-12.8153	23.4172	-23.6552	85	367.5	30	145.746	15.0057	9.00594
3.58	9.94459	24.5202	-26.6125	-11.0783	23.6792	-19.6279	82.5	370	30	144.614	15.0109	12.4771
3.6	9.73809	24.9713	-26.9775	-8.37939	23.9661	-15.6964	82.5	375	27.5	142.548	15.0025	16.7319
3.62	9.60922	25.4942	-27.236	-5.83281	27.2193	-11.0061	80	377.5	30	140.351	15.0027	20.0777
3.64	9.50509	26.0604	-27.4129	-3.21616	30.161	-4.98821	77.5	382.5	30	135.701	15.0026	25.5805
3.66	9.4805	26.7011	-27.4541	-0.606642	32.9988	-2.93545	75	382.5	32.5	134.474	15.0101	26.8237
3.68	9.48025	27.3877	-27.5252	2.11356	37.2612	0.381641	72.5	385	32.5	130.833	15.0119	30.1902
3.7	9.55611	28.1924	-27.43	3.01196	41.7254	5.91712	72.5	387.5	32.5	128.429	15.0099	32.2254
3.72	9.60273	29.0482	-27.3117	4.23183	44.2547	6.23369	72.5	387.5	32.5	128.428	15.0099	32.2254
3.74	9.73741	29.9708	-27.1659	8.16687	48.8271	9.97652	72.5	390	30	125.772	15.0111	34.3158
3.76	9.915	30.9937	-26.9085	8.97077	51.9917	14.3168	72.5	387.5	32.5	128.429	15.0099	32.2254
3.78	10.0942	32.0381	-26.5988	9.55885	52.8596	17.5209	72.5	387.5	32.5	128.425	15.0099	32.2254
3.8	10.3043	33.1085	-26.2113	11.712	54.4283	19.908	75	387.5	30	129.857	15.0038	31.0423
3.82	10.5578	34.2032	-25.7937	12.5535	53.7724	24.29	75	385	30	132.285	15.0103	28.9046
3.84	10.8128	35.2517	-25.2451	14.5905	52.087	27.705	77.5	382.5	30	135.702	15.0026	25.5805
3.86	11.1492	36.2784	-24.6983	18.5598	49.1397	28.6885	80	380	27.5	138.651	15.0025	22.2687
3.88	11.534	37.2096	-24.0978	18.1136	44.8621	29.8245	80	375	30	141.786	15.0103	17.9639
3.9	11.8734	38.0728	-23.5011	18.2495	40.4686	31.9177	85	372.5	25	144.226	15.0066	13.4481
3.92	12.2588	38.8396	-22.825	17.3194	38.505	33.6802	85	367.5	27.5	145.742	15.0083	9.00594
3.94	12.5678	39.606	-22.1756	16.9774	35.3829	31.4283	87.5	365	25	146.316	15.0017	5.58875
3.96	12.9328	40.2344	-21.5775	15.7795	27.7515	27.571	92.5	357.5	30	146.417	15.0119	3.53497
3.98	13.1902	40.7392	-21.0638	12.6971	24.936	26.1863	95	355	27.5	146.089	15.0119	7.06657
4	13.4505	41.2446	-20.5478	12.0649	24.015	21.0046	95	350	27.5	145.116	15.0019	11.169
4.02	13.6621	41.7031	-20.223	9.0418	23.1502	16.0708	100	347.5	27.5	142.936	15.0098	15.9579
4.04	13.8128	42.1824	-19.8918	6.59869	24.2505	14.2103	100	342.5	27.5	140.348	15.0089	20.0777
4.06	13.9188	42.6854	-19.6724	2.25065	27.4088	8.31683	102.5	340	27.5	137.637	15.012	23.4485
4.08	13.9199	43.2828	-19.5535	1.4282	31.0578	3.911	105	337.5	30	134.461	15.0119	26.8237
4.1	13.9786	43.9277	-19.5131	1.27941	34.3166	-0.0744254	107.5	335	30	130.814	15.0076	30.1902
4.12	13.9491	44.667	-19.5563	-3.68624	39.9856	-4.24024	107.5	332.5	30	128.413	15.0117	32.2254
4.14	13.8455	45.5234	-19.6767	-5.45915	44.9143	-7.30674	110	332.5	32.5	126.763	15.0084	33.5382
4.16	13.7396	46.4518	-19.8447	-5.4927	47.6013	-9.52119	107.5	330	30	125.775	15.0111	34.3158
4.18	13.6124	47.4269	-20.067	-8.62946	50.5724	-13.7018	107.5	330	27.5	125.763	15.0106	34.3158
4.2	13.4028	48.4706	-20.393	-9.76805	52.8208	-18.0075	107.5	330	30	125.776	15.0111	34.3158
4.22	13.2226	49.5363	-20.7743	-10.6068	54.7796	-19.6216	107.5	332.5	30	128.415	15.0117	32.2254
4.24	12.9648	50.6495	-21.1818	-14.6286	54.8631	-22.0144	105	335	32.5	132.289	15.0033	28.9046
4.26	12.6544	51.7107	-21.6684	-14.9307	51.0362	-27.3654	105	337.5	30	134.462	15.0119	26.8237
4.28	12.3681	52.6993	-22.2624	-15.3738	49.3847	-29.8737	100	340	27.5	138.65	15.0025	22.2687
4.3	12.032	53.6861	-22.8512	-17.7184	48.0253	-30.061	97.5	342.5	27.5	141.107	15.0101	18.9931
4.32	11.6752	54.6004	-23.4743	-16.5985	42.5631	-32.7131	97.5	347.5	27.5	143.704	15.0084	14.5466
4.34	11.3636	55.393	-24.1494	-16.7692	38.8605	-33.3619	95	352.5	25	145.73	15.0102	9.00594
4.36	11.0048	56.1394	-24.7964	-16.9435	31.4998	-32.0128	92.5	355	27.5	146.32	15.001	5.58875
4.38	10.6934	56.672	-25.4211	-15.6679	27.9194	-29.352	90	360	27.5	146.143	15	1.44653e-14
4.4	10.3802	57.2723	-25.9656	-14.4932	27.3567	-25.8012	85	365	30	146.093	15.0116	7.06657
4.42	10.1268	57.7555	-26.4581	-10.4814	23.533	-23.7057	82.5	367.5	30	145.247	15.0114	10.5914
4.44	9.9506	58.2413	-26.9001	-8.84996	25.6281	-18.8622	82.5	372.5	27.5	143.712	15.0084	14.5466
4.46	9.77244	58.7764	-27.2079	-7.36075	25.9956	-13.1893	80	375	27.5	141.762	15.012	17.9639
4.48	9.66902	59.2891	-27.4367	-2.97352	27.8655	-9.44482	77.5	380	27.5	137.636	15.012	23.4485
4.5	9.64075	59.8989	-27.5851	-1.39346	30.9092	-5.34228	77.5	382.5	27.5	135.699	15.0099	25.5805
4.52	9.61074	60.5335	-27.6512	-0.186488	35.1496	-1.43985	75	385	30	132.281	15.0103	28.9046
4.54	9.64065	61.3129	-27.6418	2.67769	41.198	2.89017	75	387.5	27.5	129.846	15.0111	31.0423
4.56	9.71298	62.1652	-27.5447	4.4659	43.7859	5.15794	72.5	387.5	30	128.414	15.0117	32.2254
4.58	9.81599	63.0649	-27.4274	5.72808	46.9985	9.35777	72.5	390	30	125.776	15.0111	34.3158
4.6	9.94167	64.0411	-27.1738	6.89217	49.3005	12.7988	72.5	390	30	125.773	15.0111	34.3158
4.62	10.0955	65.0408	-26.9202	8.69624	52.553	15.1735	72.5	390	30	125.776	15.0111	34.3158
4.64	10.2946	66.1399	-26.5584	11.741	55.5629	19.4755	72.5	387.5	30	128.421	15.0117	32.2254
4.66	10.5527	67.2428	-26.146	12.1001	54.6483	22.6934	75	387.5	27.5	129.851	15.0111	31.0423
4.68	10.7814	68.3222	-25.6547	13.0857	53.6084	25.2259	77.5	385	27.5	133.502	15.0034	27.77
4.7	11.0851	69.3834	-25.137	16.1102	52.2374	27.8755	80	382.5	25	136.699	15.0031	24.5162
4.72	11.4139	70.399	-24.5407	16.7511	48.5112	30.4219	80	377.5	27.5	140.348	15.0089	20.0777
4.74	11.7465	71.3201	-23.9236	15.6266	44.3406	32.4299	82.5	375	25	142.546	15.0059	16.7319
4.76	12.052	72.173	-23.2484	17.5316	40.8565	33.7744	82.5	370	30	144.621	15.0109	12.4771
4.78	12.4393	72.9338	-22.5819	17.875	32.2723	33.6649	90	367.5	27.5	145.935	15.0088	7.5
4.8	12.7485	73.5027	-21.9132	14.5242	31.9697	31.6397	90	362.5	25	146.359	15.0119	2.5
4.82	13.029	74.2127	-21.3215	13.3486	31.715	29.1094	92.5	357.5	27.5	146.39	15.012	3.53497
4.84	13.2838	74.7313	-20.7586	12.3495	22.3576	24.7192	95	352.5	25	145.729	15.0102	9.00594
4.86	13.5182	75.1507	-20.3316	10.6104	22.3547	20.8798	97.5	350	27.5	144.607	15.0119	12.4771
4.88	13.6987	75.6411	-19.927	7.07979	24.5902	16.4297	100	345	25	141.757	15.011	17.9639
4.9	13.8014	76.1258	-19.6797	3.53281	24.3198	10.5657	100	340	25	138.649	15.0084	22.2687
4.92	13.8497	76.6304	-19.4866	1.92681	27.0768	8.80409	102.5	337.5	25	135.689	15.012	25.5805
4.94	13.8787	77.2285	-19.3441	0.147798	33.5449	3.31524	105	335	27.5	132.271	15.0117	28.9046
4.96	13.8545	77.9642	-19.3547	-1.85571	38.1048	-2.32211	105	332.5	27.5	129.847	15.0111	31.0423
4.98	13.8042	78.7451	-19.4202	-3.9937	41.2641	-4.39532	107.5	330	27.5	125.765	15.0106	34.3158
5	13.6994	79.6184	-19.538	-5.11108	45.347	-8.60702	107.5	330	30	125.775	15.0111	34.3158
5.02	13.5962	80.5591	-19.7559	-7.05586	49.5561	-10.7839	107.5	327.5	27.5	122.888	15.012	36.4518
5.04	13.417	81.5925	-19.9745	-9.14183	52.2325	-14.1171	107.5	330	30	125.774	15.0111	34.3158
5.06	13.2383	82.6446	-20.3243	-9.44197	54.6495	-18.1773	107.5	330	30	125.775	15.0111	34.3158
5.08	13.0307	83.7666	-20.6977	-11.7981	54.9872	-21.2249	105	330	27.5	127.182	15.0066	33.2259
5.1	12.7722	84.8357	-21.1783	-12.8686	54.1447	-25.4822	102.5	332.5	25	131.058	15.0057	30.0046
5.12	12.5195	85.925	-21.7123	-13.1282	52.236	-28.9141	102.5	337.5	25	135.687	15.012	25.5805
5.14	12.2371	86.9169	-22.3254	-15.5179	48.7641	-30.5663	100	340	25	138.649	15.0084	22.2687
5.16	11.9006	87.8796	-22.9354	-17.7179	46.5705	-32.6543	97.5	342.5	22.5	141.114	15.0046	18.9931
5.18	11.5453	88.7691	-23.6277	-16.5698	42.3372	-34.2628	95	347.5	22.5	144.229	15.0018	13.4481
5.2	11.2371	89.565	-24.293	-15.9115	37.043	-33.3978	95	352.5	25	145.726	15.0102	9.00594
5.22	10.9058	90.2393	-24.9632	-16.1973	28.9269	-33.0972	92.5	357.5	25	146.384	15.012	3.53497
5.24	10.6041	90.7508	-25.6039	-13.2462	26.1693	-30.3338	90	360	22.5	146.141	15	1.44653e-14
5.26	10.3683	91.3129	-26.1717	-12.4421	28.732	-27.0282	87.5	367.5	27.5	145.976	15.0095	7.90343
5.28	10.1158	91.8732	-26.681	-9.54801	25.0306	-23.139	82.5	370	27.5	144.606	15.0119	12.4771
5.3	9.986	92.323	-27.0931	-6.65645	23.1063	-18.6458	82.5	375	27.5	142.549	15.0025	16.7319
5.32	9.83726	92.8241	-27.4222	-6.47581	26.2934	-13.33	80	377.5	27.5	140.347	15.0089	20.0777
5.34	9.73718	93.3751	-27.6258	-4.10104	28.6968	-7.7275	80	382.5	25	136.701	15.0031	24.5162
5.36	9.6795	93.98	-27.7434	-0.535473	32.7931	-4.64373	77.5	385	27.5	133.502	15.0034	27.77
5.38	9.70817	94.6823	-27.8085	1.62983	35.7734	-0.867544	77.5	387.5	25	131.056	15.0057	30.0046
5.4	9.73373	95.4116	-27.7694	1.55134	38.7221	5.00741	75	387.5	27.5	129.849	15.0111	31.0423
5.42	9.77987	96.2424	-27.6253	3.75987	44.0063	7.35849	75	390	27.5	127.181	15.0066	33.2259
5.44	9.88073	97.1674	-27.479	5.08435	48.379	8.81742	75	390	27.5	127.179	15.0066	33.2259
5.46	9.98177	98.1671	-27.2514	5.96668	50.8721	15.0644	75	390	27.5	127.181	15.0066	33.2259
5.48	10.1287	99.1979	-26.8946				75	390	27.5	127.183	15.0066	33.2259
5.5	10.3316	100.277	-26.5657				75	390	25	127.174	15.0119	33.2259

## Sheet: Transitional
	Displacement (mm)			Velocity (mm/s)			Euler angles (o)
t (s)	x	y	z	dx/dt	dy/dt	dz/dt	1	2	3	A (mm^2)	D(mm)	Inc_angles
0	9.99806	-116.356	-5.59907				95	32.5	5	226.637	19.8866	32.8406
0.02	10.4368	-115.362	-4.97688				97.5	32.5	5	225.851	19.9621	33.2615
0.04	10.7423	-114.312	-4.29644	14.2761	53.5542	38.0495	100	30	2.5	229.851	20.0006	31.4749
0.06	11.017	-113.225	-3.45497	12.0844	55.3304	43.7252	102.5	30	2.5	228.195	20.016	32.2748
0.08	11.2135	-112.109	-2.55568	7.2685	55.6805	47.7651	105	27.5	0	230.849	20.005	31.0423
0.1	11.3066	-111.018	-1.54487	2.46248	51.8022	52.2651	105	25	0	235.168	20.0137	28.9046
0.12	11.3147	-110.024	-0.47927	-1.60388	50.9933	53.8176	107.5	22.5	0	236.379	19.9978	28.2223
0.14	11.2355	-108.974	0.612663	-7.25852	51.2145	56.8079	107.5	17.5	-2.5	242.766	19.9761	24.5532
0.16	11.0297	-107.995	1.78838	-11.8417	47.3237	59.1209	107.5	15	-2.5	245.257	19.9451	22.8949
0.18	10.7685	-107.085	2.96246	-14.7699	42.9739	58.8897	107.5	12.5	-2.5	247.282	19.9046	21.3915
0.2	10.4205	-106.266	4.13009	-21.8296	40.9153	56.2312	107.5	7.5	-2.5	250.383	19.9165	18.9931
0.22	9.90658	-105.453	5.21276	-26.5023	38.0615	54.1315	107.5	5	-2.5	251.584	19.9822	18.1788
0.24	9.37377	-104.761	6.29534	-28.494	31.3822	52.2438	105	0	-2.5	255.09	20.0085	15
0.26	8.75521	-104.18	7.29289	-33.5246	28.6124	48.775	105	-2.5	-2.5	254.886	20.0154	15.2022
0.28	8.04808	-103.613	8.2326	-35.3499	26.2256	42.6764	102.5	-5	-2.5	256.203	20.0026	13.4481
0.3	7.34698	-103.132	9.00487	-36.3693	23.4761	37.7828	100	-10	-5	255.627	19.9945	14.106
0.32	6.5919	-102.67	9.74884	-38.1378	21.42	34.3343	100	-12.5	-5	254.062	20.0077	15.9579
0.34	5.8344	-102.27	10.3549	-37.2916	20.2336	26.2241	97.5	-15	-5	253.416	20.0079	16.7319
0.36	5.10056	-101.86	10.7928	-36.96	18.5316	17.2208	95	-17.5	-5	251.776	20.0151	18.1788
0.38	4.36625	-101.51	11.0624	-34.5968	20.3357	11.8093	92.5	-20	-7.5	249.226	19.988	20.1493
0.4	3.71706	-101.039	11.2757	-32.494	23.365	8.50787	87.5	-20	-12.5	248.911	19.9017	20.1493
0.42	3.0696	-100.587	11.3844	-30.0034	23.4824	1.40391	85	-22.5	-12.5	244.557	19.7698	23.0207
0.44	2.52594	-100.08	11.3265	-25.5785	28.1969	-6.64693	82.5	-25	-12.5	239.804	19.7872	26.0313
0.46	2.03815	-99.4678	11.1319	-23.3796	30.3726	-12.1279	80	-25	-15	238.561	19.8308	26.806
0.48	1.6043	-98.8541	10.8511	-18.4006	34.6094	-16.1596	75	-25	-17.5	234.908	19.9329	28.9046
0.5	1.30755	-98.0718	10.4916	-12.3352	41.6007	-19.0832	72.5	-25	-17.5	232.473	19.9807	30.1902
0.52	1.09732	-97.2178	10.0827	-9.28972	42.9417	-22.8881	70	-22.5	-20	233.463	20.0116	29.7542
0.54	0.94275	-96.3618	9.56466	-4.91117	43.2721	-29.1073	67.5	-22.5	-22.5	230.061	20.0142	31.3997
0.56	0.915398	-95.4803	8.92862	2.53987	44.9541	-33.5965	65	-20	-22.5	229.649	20.0108	31.6083
0.58	1.03088	-94.5565	8.24479	6.93673	48.0893	-33.3075	65	-17.5	-22.5	232.583	20.0156	30.1902
0.6	1.19278	-93.5641	7.58693	11.3904	49.6616	-35.3927	62.5	-15	-25	230.759	19.9979	31.0423
0.62	1.49701	-92.5744	6.82495	18.0189	50.6685	-38.4743	62.5	-12.5	-25	232.803	19.9627	30.0046
0.64	1.91075	-91.5424	6.06413	23.7926	50.8912	-38.2574	62.5	-10	-25	234.417	19.9082	29.1279
0.66	2.45011	-90.543	5.2962	30.023	50.4896	-38.1339	62.5	-5	-25	236.345	19.7381	27.9159
0.68	3.10732	-89.5266	4.53868	35.5153	49.5696	-38.6152	65	-5	-25	240.834	19.8147	25.4635
0.7	3.864	-88.5654	3.77355	39.7299	47.395	-34.6356	65	-2.5	-25	241.143	19.7118	25.1167
0.72	4.69824	-87.6183	3.15055	44.5593	48.2201	-31.4602	65	0	-22.5	241.709	19.8581	25
0.74	5.64233	-86.6517	2.50371	48.5443	45.9514	-30.9629	67.5	2.5	-25	245.624	19.938	22.6313
0.76	6.63971	-85.7897	1.93048	52.6966	41.9692	-26.4145	70	5	-25	248.724	20.0052	20.5907
0.78	7.7451	-84.9644	1.44401	56.2913	39.6918	-22.9252	72.5	7.5	-27.5	250.846	20.0151	18.9931
0.8	8.87323	-84.1924	1.01242	56.257	39.4522	-20.0376	75	10	-27.5	252.057	20.0152	17.9639
0.82	10.0006	-83.4	0.661365	57.8049	36.418	-13.2411	77.5	12.5	-27.5	252.266	19.9916	17.607
0.84	11.1818	-82.7436	0.478336	58.7567	31.9075	-7.44504	80	12.5	-27.5	253.836	19.9664	15.9579
0.86	12.3404	-82.1141	0.34916	58.0345	29.4978	-4.42458	85	15	-30	254.248	19.9923	15.7932
0.88	13.4899	-81.5625	0.301587	55.1339	27.1086	-1.34565	87.5	15	-30	254.979	20.0157	15.2022
0.9	14.5373	-81.0305	0.309267	50.7913	24.4545	4.27369	90	15	-30	255.222	20.0011	15
0.92	15.5254	-80.5813	0.482149	47.5665	21.8638	12.0499	95	17.5	-32.5	251.698	20.003	18.1788
0.94	16.4343	-80.1336	0.767977	43.1391	23.7931	14.5917	97.5	17.5	-32.5	250.518	19.9526	18.9931
0.96	17.2499	-79.6343	1.0793	38.8144	24.2949	20.5256	102.5	17.5	-35	247.031	19.8266	21.3915
0.98	17.9803	-79.1649	1.58444	33.3895	23.8679	25.5512	105	15	-35	247.847	19.9521	21.0906
1	18.578	-78.6626	2.0877	26.8823	27.2043	27.9523	107.5	15	-35	245.369	19.9802	22.8949
1.02	19.0452	-78.0884	2.7029	18.6109	27.5321	31.1291	112.5	15	-37.5	238.972	20.001	26.8237
1.04	19.3169	-77.5514	3.31842	8.98051	29.9854	31.2847	115	12.5	-37.5	237.332	20.0135	27.77
1.06	19.4251	-76.8826	3.9592	3.5405	33.6514	33.0207	117.5	10	-40	234.738	20.0113	29.1279
1.08	19.4622	-76.213	4.62981	-1.46062	35.4027	32.7476	120	7.5	-40	231.244	20.0067	30.8384
1.1	19.3578	-75.458	5.26913	-8.33905	39.1461	32.9419	120	5	-40	232.077	19.973	30.3755
1.12	19.1286	-74.6507	5.93837	-14.9723	42.0497	31.5547	122.5	2.5	-42.5	227.279	19.9298	32.5855
1.14	18.7575	-73.7792	6.52162	-22.1426	44.5365	28.1021	122.5	-2.5	-42.5	226.933	19.7489	32.5855
1.16	18.2532	-72.8751	7.07662	-26.9563	46.003	28.1829	122.5	-5	-42.5	226.132	19.6201	32.8406
1.18	17.6691	-71.9418	7.63055	-34.4018	47.1773	24.5887	120	-7.5	-42.5	230.197	19.5259	30.8384
1.2	16.8912	-70.9918	8.04593	-38.7769	47.8819	18.3756	120	-10	-42.5	229.105	19.641	31.4749
1.22	16.118	-70.0354	8.37482	-43.3972	46.7957	14.4718	117.5	-12.5	-45	232.388	19.771	30.0046
1.24	15.1505	-69.1157	8.62062	-49.4607	46.4912	9.49932	115	-15	-45	234.878	19.9199	28.9046
1.26	14.1589	-68.1643	8.75486	-51.6129	48.7769	4.87008	112.5	-17.5	-45	236.394	20.0009	28.2223
1.28	13.0889	-67.1807	8.80645	-53.7624	47.8724	-1.43079	110	-17.5	-47.5	239.871	20.0095	26.3369
1.3	12.0121	-66.2617	8.69263	-55.5197	44.6503	-8.86597	107.5	-20	-47.5	239.937	20.0041	26.3369
1.32	10.8798	-65.384	8.46614	-55.0243	43.8555	-13.1909	102.5	-20	-50	244.673	20.0145	23.4485
1.34	9.81039	-64.507	8.1602	-55.1876	42.9935	-18.8585	100	-20	-52.5	246.398	20.0068	22.2687
1.36	8.68081	-63.6688	7.71287	-53.8813	41.4485	-24.425	97.5	-20	-52.5	247.619	19.9729	21.306
1.38	7.66554	-62.8584	7.19255	-50.6611	38.2246	-27.9916	92.5	-20	-55	248.783	19.865	20.1493
1.4	6.65248	-62.1431	6.5869	-48.1691	34.595	-33.0846	90	-20	-57.5	248.99	19.8708	20
1.42	5.74246	-61.4752	5.87044	-45.2735	30.8463	-37.9985	87.5	-17.5	-57.5	252.129	19.9776	17.6721
1.44	4.85672	-60.9059	5.07628	-39.3086	27.2627	-41.1798	85	-17.5	-60	251.688	20.0028	18.1788
1.46	4.16509	-60.3641	4.2272	-34.6017	27.6367	-44.0391	82.5	-15	-60	253.407	20.0107	16.7319
1.48	3.46755	-59.7973	3.32413	-31.4925	28.457	-45.1151	80	-12.5	-62.5	254.162	20.0156	15.9579
1.5	2.9335	-59.239	2.4226	-22.3757	26.3476	-46.5511	77.5	-10	-62.5	253.944	19.9879	15.9579
1.52	2.56226	-58.7351	1.46713	-15.8225	26.2523	-47.5366	75	-7.5	-62.5	252.861	19.9179	16.7319
1.54	2.29291	-58.1896	0.543482	-10.543	25.7111	-44.0445	72.5	-5	-65	251.517	19.9655	18.1788
1.56	2.14024	-57.7022	-0.300039	-5.19966	25.861	-42.2211	72.5	-2.5	-65	252.281	20.0073	17.6721
1.58	2.08766	-57.1469	-1.14408	0.665567	27.8732	-40.0899	70	2.5	-65	249.414	20.009	20.1493
1.6	2.16818	-56.6	-1.90032	6.95917	27.1536	-37.666	70	5	-67.5	248.806	20.016	20.5907
1.62	2.35671	-56.0614	-2.63719	11.2585	26.3203	-32.7537	70	7.5	-67.5	247.745	20.0002	21.306
1.64	2.62242	-55.535	-3.20502	16.6413	27.7395	-27.0989	70	12.5	-67.5	244.202	19.8708	23.4485
1.66	3.01951	-54.9437	-3.72079	21.5739	30.6589	-21.5007	70	15	-67.5	241.754	19.758	24.8142
1.68	3.47666	-54.3162	-4.06545	25.2128	31.7428	-15.9464	70	17.5	-70	239.014	19.6784	26.3369
1.7	4.0129	-53.6691	-4.36047	26.0249	33.8078	-10.8964	72.5	20	-70	239.389	19.8326	26.3369
1.72	4.51848	-52.9562	-4.49525	27.0548	37.5072	-4.6096	75	22.5	-72.5	238.742	19.9158	26.8237
1.74	5.10808	-52.1774	-4.54402	31.11	39.1771	1.70655	77.5	25	-75	237.16	19.9712	27.77
1.76	5.7449	-51.3844	-4.42758	31.5401	42.0842	7.89043	80	27.5	-75	234.696	20.0137	29.1279
1.78	6.35789	-50.4973	-4.22872	29.9882	44.5346	13.8008	82.5	27.5	-77.5	236.083	20.0155	28.4272
1.8	6.94736	-49.6155	-3.86651	29.1847	44.1395	21.9672	85	30	-80	232.234	20.0045	30.3755
1.82	7.53058	-48.7146	-3.36765	29.7972	47.9753	26.2986	87.5	30	-80	232.779	20.0152	30.0943
1.84	8.1221	-47.7165	-2.81119	27.1041	47.4887	31.609	92.5	27.5	-82.5	237.459	19.9697	27.6046
1.86	8.60452	-46.8193	-2.09777	22.4646	46.3294	38.1733	95	27.5	-85	236.787	19.932	27.9159
1.88	9.03387	-45.8507	-1.29362	21.0141	48.1963	42.8575	97.5	27.5	-85	235.594	19.8337	28.4272
1.9	9.43322	-44.9072	-0.388699	17.086	46.3803	46.819	100	25	-87.5	238.419	19.7715	26.806
1.92	9.70834	-43.9868	0.57558	11.4715	46.7999	50.3259	102.5	22.5	-87.5	240.473	19.7496	25.5805
1.94	9.89964	-43.0392	1.61926	7.81009	46.4132	52.8066	105	20	-90	242.065	19.8706	24.8142
1.96	10.0121	-42.1385	2.69183	2.33232	44.5536	56.5457	105	17.5	-90	245.426	19.9432	22.8949
1.98	9.98885	-41.2603	3.86768	-3.98784	42.2384	57.8369	107.5	15	-90	245.364	20.0089	22.8949
2	9.86224	-40.4488	4.992	-8.22989	40.0722	56.3605	107.5	12.5	-90	247.649	20.0152	21.3915
2.02	9.65786	-39.6584	6.13978	-12.7454	37.7758	59.3245	107.5	10	-90	249.544	20.0066	20.0777
2.04	9.33937	-38.9404	7.34209	-20.3003	34.8602	57.6258	107.5	5	-90	251.676	19.9997	18.1788
2.06	8.86478	-38.2597	8.43052	-23.9669	32.8186	53.1459	107.5	2.5	-90	251.915	19.9579	17.6721
2.08	8.38966	-37.6252	9.4877	-25.9545	31.2236	53.6746	107.5	0	-90	251.994	19.8898	17.5
2.1	7.81225	-37.0132	10.5497	-31.2449	29.0578	48.3801	107.5	-5	-90	251.676	19.9997	18.1788
2.12	7.14816	-36.4626	11.4136	-34.7441	27.0391	41.6761	105	-7.5	-92.5	253.382	20.0157	16.7319
2.14	6.43155	-35.9326	12.2263	-36.7794	24.4094	37.4574	105	-10	-92.5	252.076	20.0033	17.9639
2.16	5.68269	-35.4697	12.8982	-37.9071	25.2151	30.1475	102.5	-12.5	-92.5	252.374	20.0103	17.607
2.18	4.91556	-34.9282	13.437	-39.2988	24.8629	24.4873	100	-17.5	-92.5	248.909	19.8743	20.0777
2.2	4.11787	-34.4789	13.8635	-39.4057	23.4613	15.7286	97.5	-20	-95	247.256	19.8659	21.306
2.22	3.3447	-33.9739	14.0715	-38.7204	25.4542	7.9409	95	-22.5	-95	245.073	19.9466	23.0207
2.24	2.57321	-33.4657	14.2001	-37.5748	25.7484	4.26796	95	-25	-95	241.157	19.9395	25.4635
2.26	1.85115	-32.9315	14.2237	-34.5393	28.6529	-3.67657	87.5	-25	-100	242.017	20.0157	25.1167
2.28	1.18745	-32.3195	14.0563	-32.8796	31.4973	-10.8961	85	-27.5	-100	237.066	20.0074	27.9159
2.3	0.548095	-31.6809	13.8036	-28.8482	32.1817	-14.836	82.5	-27.5	-102.5	236.085	20.0155	28.4272
2.32	0.0398594	-31.0199	13.4541	-23.8582	35.4497	-20.8345	77.5	-27.5	-105	232.853	19.9826	30.0046
2.34	-0.406039	-30.2585	12.9674	-19.0566	39.6147	-27.5756	75	-27.5	-107.5	230.65	19.9544	31.0423
2.36	-0.719643	-29.4484	12.3672	-13.6065	40.8471	-31.0375	72.5	-25	-110	232.273	19.8944	30.1902
2.38	-0.954355	-28.6165	11.7259	-9.13193	44.231	-35.0802	70	-25	-110	229.109	19.7853	31.6083
2.4	-1.0811	-27.6875	10.971	-4.04555	45.8583	-37.8605	67.5	-22.5	-112.5	229.329	19.6744	31.3997
2.42	-1.10603	-26.7866	10.2176	3.10913	46.7081	-39.456	65	-20	-112.5	228.615	19.5349	31.6083
2.44	-0.962117	-25.8149	9.38747	8.96172	48.8441	-42.6234	65	-17.5	-112.5	231.842	19.6879	30.1902
2.46	-0.748682	-24.8455	8.52681	14.5695	48.3388	-42.8341	62.5	-12.5	-115	232.609	19.8802	30.0046
2.48	-0.37312	-23.8814	7.67441	21.3611	48.443	-43.4298	62.5	-10	-117.5	234.426	19.9182	29.1279
2.5	0.10927	-22.9199	6.79333	28.7956	46.1328	-43.5144	62.5	-7.5	-117.5	235.941	19.9796	28.4272
2.52	0.77484	-22.0362	5.94278	35.9459	43.898	-41.7756	62.5	-5	-117.5	237.01	20.0113	27.9159
2.54	1.52405	-21.1556	5.1172	38.484	43.136	-41.6325	65	-2.5	-117.5	242.024	20.0137	25.1167
2.56	2.31811	-20.3029	4.29151	42.0334	43.7485	-38.7911	65	0	-117.5	242.227	20.0128	25
2.58	3.21922	-19.4061	3.57497	48.5991	44.4776	-34.3849	67.5	2.5	-120	245.917	20.0159	22.6313
2.6	4.24819	-18.5396	2.91482	52.2357	42.036	-30.3599	67.5	2.5	-120	245.923	20.0159	22.6313
2.62	5.30096	-17.724	2.35609	54.7801	40.4255	-27.2242	70	5	-120	248.681	19.9962	20.5907
2.64	6.43546	-16.9346	1.82683	56.9805	36.3063	-24.0983	72.5	7.5	-120	250.472	19.9408	18.9931
2.66	7.57014	-16.2681	1.40486	57.2491	32.7059	-18.3515	77.5	10	-122.5	253.799	19.9593	15.9579
2.68	8.72628	-15.6062	1.08856	57.9582	33.2394	-13.7822	80	10	-122.5	255.684	20.0028	14.106
2.7	9.88772	-14.9463	0.854281	58.8085	32.0049	-8.95015	82.5	12.5	-122.5	255.488	20.0111	14.5466
2.72	11.0662	-14.3377	0.729945	57.4829	28.83	-4.2499	85	12.5	-125	256.399	20.0088	13.4481
2.74	12.1751	-13.801	0.683974	54.2278	24.0659	0.400957	90	12.5	-127.5	256.845	19.9968	12.5
2.76	13.2294	-13.3629	0.746074	50.2211	21.6078	5.40607	92.5	12.5	-127.5	256.577	19.9823	12.7436
2.78	14.179	-12.9242	0.887084	45.5456	20.9456	7.55236	97.5	12.5	-130	255.453	20.016	14.5466
2.8	15.0444	-12.509	1.05737	39.7514	23.6945	11.7671	100	12.5	-130	254.194	20.0041	15.9579
2.82	15.7642	-11.9965	1.36176	33.0864	22.0938	17.1015	105	12.5	-132.5	250.271	20.0146	19.4333
2.84	16.3707	-11.6287	1.71936	27.1858	19.4972	17.9166	107.5	12.5	-132.5	247.594	19.9957	21.3915
2.86	16.8487	-11.1844	2.07864	20.8699	23.4493	19.3438	112.5	10	-135	242.534	19.8697	24.5162
2.88	17.1954	-10.6907	2.49247	12.6012	26.5874	20.7556	115	7.5	-135	239.567	19.6923	26.0313
2.9	17.3529	-10.1206	2.90418	4.48189	29.6759	21.2388	117.5	7.5	-135	235.137	19.6277	28.4272
2.92	17.3805	-9.49942	3.3423	-2.69519	33.5135	22.1084	120	5	-135	231.563	19.7326	30.3755
2.94	17.2539	-8.7761	3.77995	-8.32475	38.1382	21.2579	122.5	2.5	-137.5	226.933	19.7489	32.5855
2.96	17.0503	-7.97826	4.1926	-13.5205	41.477	20.7476	125	0	-137.5	221.58	19.82	35
2.98	16.7091	-7.10452	4.60466	-19.5871	47.6259	19.4216	125	-2.5	-137.5	221.542	19.9041	35.0778
3	16.267	-6.08119	4.96061	-25.3865	51.9749	16.4684	125	-2.5	-137.5	221.545	19.9041	35.0778
3.02	15.6888	-5.02972	5.26287	-32.2933	55.9942	13.4783	125	-5	-137.5	221.106	19.9645	35.3102
3.04	14.9801	-3.85391	5.5058	-38.1256	58.0314	11.8556	125	-7.5	-140	220.211	19.976	35.6941
3.06	14.1641	-2.72486	5.73142	-44.0156	56.7935	9.07345	122.5	-10	-140	224.67	20.0143	33.8418
3.08	13.2195	-1.56979	5.86366	-50.1169	58.745	5.49487	122.5	-12.5	-140	222.999	20.0117	34.5734
3.1	12.168	-0.38726	5.94807	-54.7479	58.0495	1.65593	120	-12.5	-140	228.213	20.0078	32.2748
3.12	11.0394	0.748092	5.92029	-57.5946	56.7496	-4.12436	117.5	-15	-142.5	230.833	20.016	31.0423
3.14	9.86275	1.88636	5.78707	-61.0805	56.7925	-8.999	112.5	-15	-142.5	238.974	20.001	26.8237
3.16	8.60044	2.99929	5.56546	-63.718	52.7411	-12.966	110	-15	-145	242.427	20.0003	24.8142
3.18	7.31539	3.99211	5.26923	-66.6147	48.2318	-16.9072	107.5	-15	-145	245.37	19.9802	22.8949
3.2	5.9529	4.93624	4.88942	-66.4625	45.555	-20.7017	102.5	-15	-147.5	249.946	19.9411	19.4333
3.22	4.66998	5.80632	4.43643	-63.7856	41.0746	-25.1976	100	-15	-147.5	251.491	19.8994	17.9639
3.24	3.38813	6.57971	3.87144	-64.5511	37.2127	-32.0661	97.5	-15	-147.5	253.001	19.9505	16.7319
3.26	2.1058	7.28201	3.17283	-61.5165	30.3724	-35.1025	92.5	-12.5	-150	257.035	20.0158	12.7436
3.28	0.931752	7.81075	2.47652	-58.0892	26.5698	-36.7826	90	-12.5	-150	257.281	20.0007	12.5
3.3	-0.217109	8.36523	1.70163	-55.0419	27.0687	-38.9922	87.5	-10	-150	258.43	20.0158	10.3047
3.32	-1.25374	8.86869	0.929677	-48.7573	21.8884	-38.6091	85	-10	-150	257.689	19.993	11.169
3.34	-2.16807	9.24903	0.156258	-42.9421	18.6734	-38.8993	80	-7.5	-152.5	257.083	20.0157	12.4771
3.36	-2.97416	9.62791	-0.620312	-38.088	17.6177	-38.0694	77.5	-5	-152.5	256.384	20.0139	13.4481
3.38	-3.67438	9.95739	-1.36246	-29.6997	16.79	-36.6786	75	-2.5	-152.5	254.697	19.997	15.2022
3.4	-4.16313	10.3073	-2.08337	-21.5209	17.4359	-34.6914	72.5	0	-152.5	252.052	19.9144	17.5
3.42	-4.55193	10.655	-2.74536	-16.7579	17.6113	-31.9605	70	2.5	-152.5	248.874	19.891	20.1493
3.44	-4.82954	11.0238	-3.35764	-10.9966	20.076	-28.416	67.5	5	-152.5	244.975	19.914	23.0207
3.46	-4.98373	11.4622	-3.88607	-3.63732	23.1931	-25.8874	65	7.5	-152.5	240.171	19.9324	26.0313
3.48	-4.97836	11.9473	-4.38915	3.19616	24.9609	-22.7034	65	10	-152.5	238.942	19.9816	26.806
3.5	-4.86953	12.4767	-4.78443	7.37803	29.9272	-17.5444	62.5	12.5	-152.5	232.87	19.9894	30.0046
3.52	-4.68297	13.1486	-5.09571	11.9633	35.7299	-13.6657	62.5	15	-155	230.756	19.9979	31.0423
3.54	-4.39135	13.8899	-5.32788	16.3728	38.2431	-8.94917	62.5	17.5	-155	228.286	20.0144	32.2254
3.56	-4.02418	14.6784	-5.45703	21.6592	40.9663	-4.88889	62.5	20	-155	225.391	20.0131	33.5382
3.58	-3.52868	15.5366	-5.5272	26.2135	45.1901	-1.90089	62.5	22.5	-155	222.077	20.0122	34.9661
3.6	-2.97979	16.49	-5.51695	30.1279	50.1068	4.4889	65	22.5	-157.5	226.286	20.0136	33.1419
3.62	-2.32749	17.5371	-5.35102	33.6	54.6749	9.68548	65	25	-157.5	222.501	20.0141	34.7754
3.64	-1.64532	18.657	-5.12491	35.0445	55.4397	15.9278	67.5	25	-160	226.252	20.0121	33.1419
3.66	-0.91695	19.751	-4.71543	38.4626	56.0622	21.9438	70	27.5	-160	225.209	19.9532	33.5382
3.68	-0.106163	20.8957	-4.25486	42.3554	56.3134	26.2313	75	27.5	-162.5	230.472	19.8723	31.0423
3.7	0.754781	21.9913	-3.65713	41.7489	54.0989	32.5457	77.5	25	-165	237.002	19.909	27.77
3.72	1.56323	23.0639	-2.95401	41.4714	53.258	38.3057	80	25	-165	238.561	19.8308	26.806
3.74	2.41845	24.1136	-2.11961	42.4417	50.8112	45.5949	82.5	25	-167.5	239.803	19.7872	26.0313
3.76	3.2501	25.0924	-1.14808	41.3923	47.7775	49.3127	85	22.5	-167.5	244.556	19.7698	23.0207
3.78	4.0637	26.0246	-0.152485	38.4247	44.8985	52.3939	87.5	20	-170	248.804	19.8708	20.1493
3.8	4.79101	26.8847	0.94794	36.7	41.2869	55.8744	90	20	-170	249.278	19.9529	20
3.82	5.52387	27.676	2.07405	33.5507	37.6615	57.6556	92.5	17.5	-172.5	252.254	20.0026	17.6721
3.84	6.12346	28.3949	3.25436	28.4485	34.9819	59.9184	95	12.5	-175	256.401	20.0088	13.4481
3.86	6.67108	29.0672	4.46155	25.632	30.7121	60.5648	97.5	10	-175	257.044	20.0156	12.4771
3.88	7.14108	29.6192	5.66751	21.1865	25.4207	59.8768	97.5	7.5	-175	258.141	20.0101	10.5914
3.9	7.51315	30.1001	6.84364	15.6507	23.0425	56.8173	100	5	-175	257.774	20.0063	11.169
3.92	7.77524	30.557	7.94062	11.9769	23.9803	54.1623	102.5	2.5	-175	256.92	20.0136	12.7436
3.94	7.9882	31.0392	9.01031	7.50319	20.695	51.9832	102.5	-2.5	-175	256.801	20.011	12.7436
3.96	8.06708	31.3765	10.0019	1.0419	15.6378	46.2201	102.5	-5	-175	256.014	19.9741	13.4481
3.98	8.04712	31.6891	10.8581	-1.61673	15.269	40.6881	105	-10	-177.5	251.629	19.9347	17.9639
4	7.9965	32.0032	11.6302	-5.81628	17.4819	35.4296	105	-12.5	-177.5	250.055	19.9694	19.4333
4.02	7.81159	32.3884	12.2711	-10.6832	19.1822	29.3165	105	-17.5	-177.5	245.484	20.0096	22.8949
4.04	7.57878	32.775	12.8027	-13.6355	21.7928	23.4819	105	-20	-177.5	242.506	20.0158	24.8142
4.06	7.26928	33.2594	13.202	-16.0819	23.8573	15.8931	105	-22.5	-177.5	239.066	20.0134	26.8237
4.08	6.93055	33.7414	13.4422	-19.9431	28.0534	9.28026	105	-27.5	-177.5	230.845	20.0143	31.0423
4.1	6.48547	34.3941	13.5733	-21.0203	34.4577	2.55608	102.5	-30	-180	228.157	20.0108	32.2748
4.12	6.09458	35.1195	13.5453	-21.4706	40.6126	-4.00853	102.5	-32.5	-180	222.923	19.9984	34.5734
4.14	5.6264	36.0143	13.4132	-22.077	46.3171	-10.5334	100	-32.5	-180	224.511	19.9504	33.8418
4.16	5.21097	36.956	13.1233	-22.6858	48.6978	-17.4146	97.5	-35	-182.5	220.034	19.885	35.6941
4.18	4.71507	37.9703	12.7253	-24.617	53.312	-22.3198	95	-35	-185	220.889	19.8468	35.3102
4.2	4.24855	39.0801	12.2222	-21.6622	56.3453	-28.9976	92.5	-35	-187.5	221.354	19.8011	35.0778
4.22	3.83507	40.212	11.5609	-21.9464	57.3556	-36.6039	90	-35	-187.5	221.299	19.6645	35
4.24	3.36989	41.3664	10.7675	-22.6152	57.0823	-42.3062	87.5	-32.5	-190	226.739	19.6486	32.5855
4.26	2.95294	42.495	9.87301	-18.9	57.1553	-47.3675	85	-30	-192.5	231.325	19.6188	30.3755
4.28	2.61912	43.645	8.87223	-14.5542	55.9169	-52.6495	85	-30	-190	231.157	19.5365	30.3755
4.3	2.3649	44.7235	7.76686	-11.405	53.2245	-58.1865	82.5	-25	-192.5	239.804	19.7872	26.0313
4.32	2.15863	45.7737	6.55421	-9.2018	50.8741	-62.0629	80	-22.5	-195	242.614	19.9006	24.5162
4.34	2.00622	46.7509	5.29355	-4.99656	47.2181	-64.527	80	-20	-195	246.201	19.9545	22.2687
4.36	1.95813	47.6544	3.98085	-1.15708	42.2494	-65.7826	80	-17.5	-195	249.331	19.9919	20.0777
4.38	1.96013	48.4371	2.66649	2.63009	36.1263	-66.51	77.5	-12.5	-195	252.476	20.0041	17.607
4.4	2.06755	49.1235	1.32561	7.4606	35.0989	-66.7336	77.5	-10	-195	254.158	20.0157	15.9579
4.42	2.25032	49.8333	0.0140536	10.5549	32.3277	-63.5888	77.5	-7.5	-195	255.377	20.0101	14.5466
4.44	2.48911	50.4007	-1.22261	13.7541	26.0789	-62.2445	77.5	-2.5	-195	256.581	19.9822	12.7436
4.46	2.79941	50.8963	-2.45799	16.8419	24.2832	-57.2511	80	0	-195	258.546	20.0157	10
4.48	3.15934	51.3681	-3.51203	19.3513	21.0933	-52.4643	80	5	-197.5	257.947	20.0151	11.169
4.5	3.57014	51.7445	-4.56104	21.5232	18.6953	-49.1257	80	7.5	-195	256.881	19.9999	12.4771
4.52	4.01057	52.124	-5.45557	21.7192	17.8018	-41.2547	82.5	10	-197.5	256.813	19.9899	12.4771
4.54	4.44365	52.4561	-6.21617	23.3159	16.6116	-34.8149	82.5	12.5	-197.5	255.285	19.9981	14.5466
4.56	4.93486	52.7885	-6.85199	23.2292	15.1294	-29.0419	85	17.5	-200	251.803	20.0158	18.1788
4.58	5.3687	53.0737	-7.37678	22.4274	15.6446	-23.2672	87.5	20	-200	249.411	20.0115	20.1493
4.6	5.83593	53.4342	-7.77038	22.863	19.7575	-14.8566	90	22.5	-202.5	246.102	20.0143	22.5
4.62	6.26962	53.8672	-7.97915	20.4517	24.0062	-8.15153	92.5	25	-202.5	241.848	19.9774	25.1167
4.64	6.65514	54.3946	-8.10534	18.7197	28.19	-3.35381	92.5	27.5	-202.5	237.461	19.9697	27.6046
4.66	7.014	54.9956	-8.1001	16.0631	32.7343	4.52844	95	30	-205	231.961	19.9242	30.3755
4.68	7.29822	55.6955	-7.93308	13.6488	35.2808	10.8544	97.5	30	-207.5	230.907	19.8771	30.8384
4.7	7.55911	56.4183	-7.68787	11.1693	40.3098	12.6889	100	30	-207.5	229.331	19.7558	31.4749
4.72	7.74031	57.3085	-7.41259	7.75186	45.5634	17.2172	102.5	30	-210	227.477	19.6799	32.2748
4.74	7.8701	58.225	-6.98152	4.64141	47.5594	25.2855	105	30	-210	225.057	19.5019	33.2259
4.76	7.92566	59.2145	-6.41436	1.55918	50.8752	30.5116	107.5	27.5	-212.5	227.306	19.5357	32.2254
4.78	7.92798	60.2521	-5.77062	-2.31587	52.6037	34.0179	107.5	27.5	-212.5	227.305	19.5357	32.2254
4.8	7.82918	61.3147	-5.04822	-6.84011	53.9498	38.8732	110	25	-215	228.914	19.6848	31.6083
4.82	7.65404	62.402	-4.21666	-11.1263	53.8832	43.6255	110	22.5	-215	232.946	19.8	29.7542
4.84	7.37575	63.4658	-3.31219	-17.3931	53.1708	46.803	110	20	-215	236.546	19.8916	27.9909
4.86	6.97082	64.5288	-2.35253	-20.9676	52.5607	48.8502	110	17.5	-215	239.711	19.9586	26.3369
4.88	6.53777	65.568	-1.36794	-24.4657	51.9873	49.1384	110	12.5	-215	244.688	20.0159	23.4485
4.9	5.98243	66.6045	-0.386717	-30.1359	51.3777	49.625	110	10	-217.5	246.482	20.013	22.2687
4.92	5.34043	67.595	0.621107	-34.1959	45.2675	51.4706	107.5	7.5	-215	250.863	20.0104	18.9931
4.94	4.62469	68.4146	1.64989	-36.1068	39.3283	48.9735	107.5	5	-217.5	251.791	20.016	18.1788
4.96	3.88286	69.1842	2.57195	-41.0258	36.715	44.9747	105	2.5	-215	254.752	20.0054	15.2022
4.98	2.98758	69.8793	3.46639	-45.4665	32.5287	45.2347	105	0	-217.5	254.782	19.9795	15
5	2.08974	70.501	4.3592	-44.8074	31.6549	40.8417	102.5	-2.5	-217.5	256.569	19.9812	12.7436
5.02	1.19168	71.1419	5.09156	-45.3734	30.0666	35.2821	100	-7.5	-217.5	257.127	20.0035	12.4771
5.04	0.269424	71.6877	5.77126	-47.0431	25.292	30.3344	97.5	-10	-217.5	257.004	20.0127	12.4771
5.06	-0.685343	72.1569	6.29518	-48.2039	21.2753	22.9632	95	-12.5	-220	255.972	19.9666	13.4481
5.08	-1.63608	72.5516	6.70794	-45.0478	19.5565	19.8916	92.5	-12.5	-220	256.694	19.9988	12.7436
5.1	-2.48344	72.9469	7.07378	-41.5686	19.3694	12.9632	90	-15	-220	255.034	20.0156	15
5.12	-3.30391	73.3142	7.22609	-39.428	15.8445	6.15111	85	-17.5	-220	251.801	20.0158	18.1788
5.14	-4.05152	73.6091	7.32921	-35.474	17.9959	1.35242	82.5	-20	-222.5	247.8	20.0132	21.306
5.16	-4.71796	74.0461	7.27513	-30.8684	21.9575	-4.94036	80	-20	-225	246.356	19.997	22.2687
5.18	-5.28206	74.4835	7.14158	-25.4401	24.4511	-8.88235	75	-20	-227.5	242.107	19.8921	24.8142
5.2	-5.73987	75.0399	6.91068	-21.1831	30.4755	-15.2391	72.5	-22.5	-227.5	236.005	19.8141	28.2223
5.22	-6.12113	75.691	6.54532	-15.0685	33.897	-18.7034	70	-20	-227.5	235.967	19.6354	27.9909
5.24	-6.34657	76.3916	6.16251	-9.95101	36.6557	-22.4791	67.5	-20	-230	232.46	19.5704	29.7542
5.26	-6.51924	77.1615	5.64502	-4.94361	40.0619	-26.9511	65	-20	-230	228.787	19.6211	31.6083
5.28	-6.53652	78.0064	5.10323	1.72045	46.2335	-27.4124	62.5	-17.5	-232.5	227.667	19.7239	32.2254
5.3	-6.45425	78.9947	4.53937	7.42793	49.0705	-30.1713	60	-15	-232.5	225.736	19.863	33.2259
5.32	-6.2395	79.9613	3.89627	13.0056	50.6185	-32.9559	60	-12.5	-232.5	227.988	19.9406	32.2748
5.34	-5.92581	81.0238	3.23047	20.2343	53.6256	-34.1699	60	-10	-232.5	229.827	19.9913	31.4749
5.36	-5.43037	82.0908	2.54146	27.6394	53.6319	-33.1131	60	-7.5	-232.5	231.244	20.0144	30.8384
5.38	-4.83745	83.1605	1.90165	31.2733	51.9953	-33.2179	60	-5	-232.5	232.232	20.0098	30.3755
5.4	-4.16605	84.1833	1.21291	38.136	53.401	-33.4969	60	-2.5	-235	232.806	20.0078	30.0943
5.42	-3.31685	85.285	0.574387	43.8032	52.4804	-31.254	62.5	0	-235	237.814	20.0158	27.5
5.44	-2.41817	86.2702	-0.0374297	48.8578	49.2819	-29.6952	65	2.5	-235	241.921	20	25.1167
5.46	-1.36715	87.2604	-0.600132	53.3114	47.2297	-25.482	67.5	5	-235	245.11	19.957	23.0207
5.48	-0.294363	88.1594	-1.0564	55.9351	45.2664	-21.6316	70	7.5	-237.5	247.408	19.9154	21.306
5.5	0.878864	89.0635	-1.4617	61.0365	42.0091	-16.9369	72.5	7.5	-235	250.282	19.8894	18.9931
5.52	2.12551	89.831	-1.73839	61.8901	36.7876	-13.2559	75	10	-237.5	251.637	19.9347	17.9639
5.54	3.34303	90.551	-1.99117	61.0968	35.0701	-9.742	77.5	12.5	-237.5	252.346	20.0065	17.607
5.56	4.56538	91.2301	-2.11072	60.0175	32.5391	-2.4349	82.5	12.5	-237.5	255.497	20.0048	14.5466
5.58	5.73461	91.8395	-2.10228	57.0001	27.3752	1.80632	85	12.5	-240	256.371	20.0156	13.4481
5.6	6.8539	92.3295	-2.04292	56.6486	23.4494	5.48935	90	12.5	-242.5	256.723	19.9789	12.5
5.62	7.9712	92.7764	-1.88224	50.423	18.7184	9.35984	92.5	12.5	-242.5	256.701	19.9997	12.7436
5.64	8.86246	93.0978	-1.66785	42.736	17.3036	13.2541	97.5	12.5	-242.5	255.496	20.0048	14.5466
5.66	9.70158	93.4935	-1.34814	39.6415	20.7983	18.3531	100	12.5	-245	254.192	20.0126	15.9579
5.68	10.4403	93.9129	-0.951067	34.6709	20.1218	20.0992	105	12.5	-245	250.124	19.9864	19.4333
5.7	11.0797	94.3057	-0.552687	28.4833	20.9414	20.3662	107.5	10	-245	248.951	19.8862	20.0777
5.72	11.566	94.7663	-0.12806	19.5727	25.0128	22.5208	110	10	-247.5	245.835	19.8331	22.2687
5.74	11.8717	95.2946	0.348033	12.6207	26.2874	24.6506	112.5	7.5	-247.5	243.798	19.8388	23.6553
5.76	12.0794	95.8217	0.849704	7.36331	28.4313	25.3419	115	7.5	-247.5	239.907	19.8289	26.0313
5.78	12.1577	96.4394	1.35329	0.0694133	31.8742	24.6883	117.5	5	-250	236.634	19.8692	27.9159
5.8	12.0864	97.1005	1.83192	-6.24417	35.7235	23.2837	120	2.5	-250	232.559	19.9359	30.0943
5.82	11.9112	97.876	2.28055	-11.9406	41.2026	20.9555	120	0	-250	232.877	19.9888	30
5.84	11.6059	98.7411	2.67968	-18.4004	45.3851	20.8839	120	-2.5	-250	232.77	20.0137	30.0943
5.86	11.1791	99.6753	3.10609				120	-5	-250	232.231	20.0111	30.3755
5.88	10.6461	100.603	3.42416				120	-7.5	-252.5	231.279	20.0056	30.8384
